# Supplementary material for: DeepOS: pan-cancer prognosis estimation from RNA-sequencing data
Source: Research Square preprint supplement (doi:10.21203/rs.3.rs-7556679/v1), 2025-11-03
Supplement: Supplementary file 1 [file 21b71bb99ba850637273232a.xlsx]

## Sheet: Supp Table 1
Model architecture	Total number of samples (training + validation)	Number of TCGA tumor types integrated in the analysis	Type of input	Perfomances from cross-validation	Performances on independant and unseen test set	Reference	Repo
Survival random forest and Cox-Lasso	953	4	Multi-omics + clinical data	Median C-index ~ 0.60; rank = [0.624 - 0.754]	NA	Yuan Y, et al. ”Assessing the clinical utility of cancer genomic and proteomic data across tumor types” Nat Biotechnol. 2014
Cox-Lasso with prior-knowledge	11854	33	Gene expression	Median C-index = 0.57; rank = [0.47 - 0.85]	NA	Zheng, X., Amos, C. I. & Frost, H. R. Comparison of pathway and gene-level models for cancer prognosis prediction. BMC Bioinformatics 21, (2020)
Cox-nnet Multilayers Perceptron with Cox loss	5031	10	RNA-seq	Median C-IPCW ~ 0.62; rank ~ [0.52 - 0.72]	NA	Ching T, Zhu X, Garmire LX. “Cox-net: An artificial neural network method for prognosis prediction of high-throughput omics data.” PLoS Comput Biol. 2018	https://github.com/lanagarmire/cox-nnet
Multikernel Learning for survival groups	6645	32	Multi-omics	NA	Median C-index = 0.62; rank = [0.59-0.75] (only 6 cancer types available)	Ramazzotti D, et al. ”Multi-omic tumor data reveal diversity of molecular mechanisms that correlate with survival”. Nat Commun. 2018
DeepSurv Multilayer NN	6000		RNA-seq			Katzman JL, Shaham U, Cloninger A, Bates J, Jiang TT, Kluger Y. DeepSurv: personalized treatment recommender system using a Cox proportional hazards deep neural network. BMC Med Res Methodol. 2018;	https://github.com/jaredleekatzman/DeepSurv
Convolutional Neural Network with Cox loss function	6404	20	Multi-omics + hystopathology slides + clinical data	NA	Median C-index (RNA-seq + clinical data) = 0.60; rank = [0.51 - 0.84]; Median C-index (all data) = 0.78; rank = [0.66 - 0.90]	Anika Cheerla and Olivier Gevaert “Deep learning with multimodal representation for pan cancer prognosis prediction”, Bioinformatics, 35, 2019
Aecox Auto Encoder with Cox loss function	5343	12	RNA-seq+ link betxeen TMB and C index / organ	Median C-index ~ 0.65; rank ~ [0.50 - 0.79]	NA	Huang Z, Johnson TS, Han Z, et al. “Deep learning-based cancer survival prognosis from RNA-seq data: approaches and evaluations.,” BMC Med Genomics. 2020	NA
VAECox		20	RNA-seq	avg C index 0.649		Kim and al, Improved survival analysis by learning shared genomic information from pan-cancer data, Bioinformatics . 2020	https://github.com/dmis-lab/VAECox.
SAVAE-Cox Self Attention Variational Autoencoder Cox Survival Analysis Model	9895	16	RNA-seq	Median C-index ~ 0.7; rank ~ [0.57 - 0.85]		Meng and al, A Novel Attention-Mechanism Based Cox Survival Model by Exploiting Pan-Cancer Empirical Genomic Information Cells . 2022 Apr	https://github.com/menggerSherry/SAVAE-Cox
BERTSurv						https://arxiv.org/abs/2103.10928
SurvTRACE						https://arxiv.org/abs/2110.00855
Transformer-Based Deep Survival Analysis						https://proceedings.mlr.press/v146/hu21a/hu21a.pdf

## Sheet: Supp Table 2
Gene symbol for DeepOS	MSigDB	LM22	Exemple of random selection #1	Exemple of random selection #2
A2M	X		DPH1	SNORD89
AAAS	X		FAM206A	MIR6754		All genes used	4499
AADAT	X		KAT5	LAMP5		MSigDB	4206
AARS	X		AASDHPPT	ZNF571		LM22	506
ABAT	X		LACE1	NR2F6		Both	213
ABCA1	X		MIR7850	SLAMF9
ABCA2	X		ANKRD13B	RBM48
ABCA3	X		FLG2	DNA2
ABCA4	X		PRSS16	VGLL1
ABCA5	X		C8orf31	OCA2
ABCA6	X		FKBPL	LINC01545
ABCA8	X		SASH1	PRICKLE4
ABCA9	X		TSC22D1-AS1	RILP
ABCB1	X		AMDHD1	TMEM18
ABCB11	X		NFXL1	DNAJB8-AS1
ABCB4	X	X	HIST1H4I	COA6
ABCB6	X		RPL27	RSPH9
ABCB7	X		KRBOX1	ABCG5
ABCB8	X		SAR1A	UBAC2
ABCB9	X	X	GIT2	DPM2
ABCC1	X		RBAKDN	GNAZ
ABCC2	X		ESPNL	RCBTB1
ABCC3	X		AMN1	WFDC10B
ABCC4	X		FBRSL1	MIR1254-1
ABCC5	X		ASB14	ZNF556
ABCC8	X		FSD1	POU3F1
ABCD1	X		RAMP3	LINC01444
ABCD2	X		OR2D3	ECE1
ABCD3	X		LARS	ZMYM1
ABCE1	X		CHST14	SPDYA
ABCF2	X		MEIS3	KRBA1
ABCG2	X		LINC00547	MIR15B
ABCG4	X		PCDH9-AS2	WWC2
ABCG8	X		ASXL1	GDF7
ABHD2	X		PCDH9-AS3	RPUSD3
ABHD4	X		EPPK1	GNG12-AS1
ABHD6	X		TCAIM	AP3M1
ABI1	X		DMGDH	ZNF295-AS1
ABI3BP	X		GIGYF2	KLHL31
ABL1	X		LRRC2	ZNF285
ABLIM1	X		ZNF280A	MPHOSPH6
ABR	X		BRINP1	TMUB2
ACAA1	X		AP1S3	PPP1R16A
ACAA2	X		GTSE1	MIR4279
ACACA	X		FAM219B	OR6K3
ACADL	X		IGFLR1	RBAK-RBAKDN
ACADM	X		C1GALT1C1	C5orf60
ACADS	X		LRRC37A3	MIR3118-4
ACADSB	X		ADAP2	COPZ1
ACADVL	X		PBDC1	DERL2
ACAP1		X	MIR5000	SYCP3
ACAT1	X		SNTG2	LINC01350
ACAT2	X		CENPC	CCNI2
ACE	X		SLC9A7	NRG4
ACHE	X	X	MIR329-2	RYR3
ACLY	X		ARNTL	VPS37C
ACO2	X		ZNF512	KCNB1
ACOT2	X		TCN1	RIOK2
ACOT8	X		SNORD115-3	ZNF354C
ACOX1	X		DTNBP1	C8orf4
ACOX2	X		MTUS2	GBP5
ACOX3	X		RFPL2	LINC00968
ACP1	X		GRIN2C	REC8
ACP2	X		FAM133B	MIR6072
ACP5	X	X	CARD10	LINC01502
ACRBP	X		EMB	TBL3
ACRV1	X		CHST11	PHKB
ACSL1	X		LINC00487	CHMP4C
ACSL3	X		OR4P4	ST8SIA6-AS1
ACSL4	X		USP17L6P	BTD
ACSL5	X		MIR337	BCO2
ACSL6	X		MIR5693	SLC16A4
ACSM1	X		HTR5A-AS1	MIR4444-2
ACSM3	X		ZAR1	MIR8068
ACSS1	X		CNR2	STAC2
ACSS2	X		SVBP	TRY2P
ACTA1	X		TRIM16L	AAGAB
ACTA2	X		ABHD17A	IGF2BP1
ACTB	X		C2orf42	SEZ6
ACTC1	X		HPS6	DISC1
ACTG1	X		SLITRK4	PTP4A2
ACTG2	X		SFTPC	LINC01037
ACTL7B	X		COL22A1	MIR4431
ACTN1	X		TFCP2	GRXCR1
ACTN2	X		DMBT1P1	NOXA1
ACTN3	X		RAI2	ZNF75D
ACTN4	X		CFAP73	SNORD115-8
ACTR2	X		MIR557	S100A5
ACTR3	X		RAD18	GMDS
ACVR1	X		C15orf41	ADAM22
ACVR1B	X		PAX8-AS1	MIR891A
ACVR2A	X		LINGO2	NBPF3
ACVRL1	X		SLC24A4	MIR4671
ADA	X		ENPP4	UCN3
ADAD1	X		LINS1	OR1N1
ADAM10	X		FAM87A	ZBTB44
ADAM12	X		DACT1	VRK3
ADAM15	X		C15orf65	UHMK1
ADAM17	X		SH3BP4	CCDC121
ADAM19	X		JPX	TBC1D3F
ADAM2	X		UTY	ZNF485
ADAM23	X		HIST1H2BJ	KLF17
ADAM28		X	ZDHHC3	ZNF397
ADAM8	X		GKN2	MIR4434
ADAM9	X		ANKRD53	STX8
ADAMDEC1	X	X	NECTIN3	FGD5-AS1
ADAMTS1	X		DNAL4	SAYSD1
ADAMTS3		X	VIPAS39	C5orf30
ADAMTS5	X		C16orf91	MIR513C
ADAR	X		PTGES2	SBK2
ADCY1	X		THOC7	TRNAU1AP
ADCY2	X		ZNF225	TGM4
ADCY6	X		PTGES3L-AARSD1	FAM225B
ADCY9	X		SNORD32A	THCAT158
ADCYAP1	X		MAGEA6	CGNL1
ADD1	X		SNORD116-24	PCA3
ADD2	X		SCGB3A2	RNU5E-1
ADD3	X		TUSC5	PPP4R3B
ADH1C	X		KRTAP12-3	DIMT1
ADH4	X		MIR644A	PDZD2
ADH5	X		MIR8086	STPG3
ADH7	X		HNRNPF	MIR499A
ADIG	X		SLC28A1	LINC01254
ADIPOQ	X		C18orf25	MIR4456
ADIPOR1	X		JMJD8	CSPP1
ADIPOR2	X		WNT10B	RDX
ADM	X		BAP1	C19orf71
ADORA2B	X		KLC4	SCGB1C2
ADRA1B	X		KBTBD12	UBE2Q2P1
ADRA2B	X		MIR6889	RBM45
ADRA2C	X		LAGE3	LCN1
ADRB2		X	MIR500A	TACR2
ADRM1	X		ZNF180	SPCS2
ADSL	X		PTPRN2	LINC01028
AEN	X		GSE1	MIR3124
AFAP1L2	X		INHBC	RIPPLY3
AFF1	X		ZSCAN23	OARD1
AFG3L2	X		GPR173	MIR8066
AGER	X		MIR125A	PUM3
AGFG1	X		HSD52	CACNA1C-AS2
AGGF1	X		TSPAN12	CDC40
AGL	X		OR5K1	MIR5696
AGPAT3	X		TSPAN2	TMEFF1
AGPAT4	X		IDNK	ZNF202
AGR2	X		MIR513B	MIR30B
AGRN	X		CD200R1	MAGEB6
AGXT	X		KIAA1211L	SNORA11C
AHCY	X		MAD2L1BP	LGSN
AHNAK	X		MIR4493	SORCS1
AHR	X		ZNF274	TXLNGY
AHSP	X		MIR496	ZBTB26
AIF1		X	MIR652	RNU6-9
AIFM1	X		HPVC1	SLC5A12
AIFM3	X		FAM35A	XAGE3
AIM1	X		PPP4R3CP	LINC01489
AIM2		X	TLR5	SAP18
AIMP2	X		UBA5	CA5A
AK1	X		KBTBD11	BICD2
AK2	X		GALNT7	2004-09-01
AK3	X		LRRC6	LINC00102
AK4	X		PTPRA	PHOX2A
AKAP1	X		PER3	TRIM64C
AKAP10	X		CUL4B	SLC39A5
AKAP12	X		IL22	MIR27A
AKAP2	X		MBD3L2	SPATA8-AS1
AKAP4	X		PXK	PAQR9-AS1
AKAP7	X		SLC22A18AS	SLC26A4-AS1
AKR1A1	X		ERICH1	PTCD1
AKR1B10	X		VAX2	OST4
AKR1C2	X		CASP14	WDR77
AKR1C3	X		NPIPA3	SNORD56
AKR1D1	X		ZNF75A	C11orf54
AKT1	X		MB21D2	SCFD1
AKT1S1	X		AGAP12P	ENPP6
AKT2	X		LINC01227	MALRD1
AKT3	X		KRTAP27-1	PRNCR1
ALAD	X		APOL2	PLPP2
ALAS1	X		FSCN2	ZBTB18
ALAS2	X		CCHCR1	DIS3L
ALB	X		MIR4694	ATP10A
ALCAM	X		ARHGEF4	LINC00163
ALDH18A1	X		KCNK9	FMNL3
ALDH1A1	X		GPATCH11	MOGAT3
ALDH1A2	X		KIR3DL1	TMEM244
ALDH1A3	X		RNF126	MIA3
ALDH1L1	X		CTD-2350J17.1	SLC35A1
ALDH2	X		SPINK13	C11orf40
ALDH3A1	X		ALKBH8	C4orf48
ALDH3A2	X		MIR4288	PLK5
ALDH3B1	X		PRR32	SNORD71
ALDH6A1	X		MIR924	SSX2IP
ALDH7A1	X		GABPB2	MIR5692B
ALDH8A1	X		MIR5739	FRAS1
ALDH9A1	X		MOCS1	USP17L3
ALDOA	X		TMEM167A	LINC01606
ALDOB	X		S100B	EPO
ALDOC	X		KHDRBS1	MIR516B2
ALG1	X		ST8SIA5	MCPH1
ALMS1	X		DCAF5	TRIL
ALOX12B	X		KTN1	ZNF669
ALOX15	X	X	WDR89	FEV
ALOX15B	X		TMEM91	SART1
ALOX5		X	SIKE1	DPPA3
ALS2	X		FOXH1	SLC25A16
AMACR	X		SPAG9	SH3BGRL3
AMBN	X		LSM14A	IL20
AMD1	X		SPRR2D	RPS16
AMFR	X		CALHM1	FLVCR1
AMIGO1	X		ZDHHC4	RUSC1
AMIGO2	X		PRPF8	LINC00399
AMMECR1	X		MIR3908	SHOX
AMPD1		X	PRSS48	DACT3-AS1
AMPD3	X		MIR8055	LYPLAL1
AMPH	X		LRRN1	PNMAL1
ANG	X		SNORA80E	TMEM27
ANGPT1	X		MIR4766	DDR2
ANGPT4		X	VCX3A	PON1
ANGPTL3	X		TTTY15	ZFP41
ANGPTL4	X		CEP55	MIR4690
ANK1	X		MIR6511A3	MAX
ANKH	X		EPG5	THRSP
ANKRA2	X		ATG3	SMIM10L1
ANKRD2	X		RPL19	TSPEAR-AS1
ANKRD55		X	MIR200A	TOMM5
ANKZF1	X		GPHB5	TPCN2
ANLN	X		TEX12	C17orf50
ANO1	X		TAF7	ARNT
ANP32E	X		GSTTP1	RTN4IP1
ANPEP	X		SSC4D	BOLA1
ANTXR2	X		MYLK-AS2	C11orf24
ANXA1	X		SPPL2C	FGF10
ANXA10	X		TOP3A	OBP2A
ANXA13	X		PLXNA3	ERVV-1
ANXA2	X		POM121L12	TMEM88
ANXA4	X		GRP	CACNB1
ANXA5	X		MIR4269	GNB5
ANXA9	X		SERPINI2	SNORD58A
AOC3	X		AMMECR1L	MYLIP
AOX1	X		PDCD7	MIR548H3
AP1G1	X		ZNF37BP	PRAMEF5
AP2B1	X		CRYBB2P1	MIR6082
AP2M1	X		PRR36	GLOD4
AP2S1	X		KIAA1429	AGK
AP3B1	X		C6orf118	RIMS2
AP3S1	X		SURF6	THSD7B
AP4B1	X		SUDS3	MIR3180-4
APAF1	X		TMUB1	SNORD19
APBB1	X		EXOC1	AP4E1
APBB2	X		NXF4	DLX1
APC	X		PKI55	RNF139-AS1
APEX1	X		AKR7A3	KIAA1456
APH1A	X		TRIM41	CST5
APLNR	X		FRMD4B	D21S2088E
APLP1	X		SENP2	TMSB4Y
APLP2	X		SPATA24	ATXN2L
APOA1	X		PCDHGA10	ZBTB21
APOA4	X		MIR1913	CSN3
APOBEC3F	X		CTD-2194D22.4	KRTAP10-8
APOBEC3G	X	X	CT45A6	KIF1A
APOC1	X		GMNN	DHDH
APOC2	X		DNAAF1	CLINT1
APOC3	X		TOB2	PHGR1
APOD	X		AGTR1	PRICKLE2
APOE	X		DCTN1-AS1	MIR2052
APOH	X		NEURL1-AS1	ATP8B5P
APOL3		X	GRM5	LINC01213
APOL6	X	X	TCEAL5	PPP2R2B-IT1
APOM	X		RRAGA	INSRR
APP	X		CYB561D1	CEP126
APPBP2	X		ZNF271P	HOXC6
APRT	X		MIR153-1	LRRC56
AQP3	X		TBC1D3H	SPG21
AQP7	X		OGFR-AS1	MIS18BP1
AQP9	X	X	PLEKHH1	POU4F2
AR	X		SLITRK1	CCDC59
ARAF	X		RERE	SCARNA13
ARAP3	X		ATG5	PLCD4
ARCN1	X		RBBP5	MIR3151
AREG	X		LINC01289	ASPHD2
ARF4	X		CBX2	STK32A
ARF6	X		RIIAD1	CCDC34
ARFGAP1	X		MIR1184-1	GAPT
ARFGAP3	X		MECR	GALNT12
ARFGEF1	X		C8orf44-SGK3	LGI3
ARFGEF2	X		ETNK1	NMD3
ARFIP1	X		C19orf53	ZDHHC14
ARFIP2	X		KCNK12	STRADB
ARG1	X		VAC14	GLRB
ARG2	X		LINC00207	H1FX
ARHGAP10	X		OR9G1	RALGAPA1
ARHGAP22		X	MED26	MIR5681A
ARHGAP27	X		ATIC	MIR548A1
ARHGAP29	X		ALKBH1	SIGLEC8
ARHGAP4	X		CFAP54	NETO1
ARHGAP5	X		LDLRAD1	ZNF79
ARHGDIA	X		ZNF479	LRFN3
ARHGDIG	X		AMELX	AGO3
ARHGEF11	X		CNPPD1	VCP
ARHGEF12	X		LINC01377	MIR548H1
ARHGEF2	X		SLC4A11	RADIL
ARHGEF3	X		ARL2-SNX15	GALNT5
ARHGEF6	X		ZNF286B	HMGCLL1
ARHGEF7	X		GPBP1L1	RAB9B
ARHGEF9	X		PIGL	SDSL
ARID4A	X		FOXL2NB	PPIC
ARID4B	X		FER	PCAT18
ARID5B	X		AGO1	FLYWCH2
ARL2BP	X		GRAMD2	ANKRD23
ARL3	X		LGALS2	SNORD114-14
ARL4A	X		SNORA67	MIR212
ARL6IP1	X		UNC13A	PIGBOS1
ARL8A	X		TSSK6	C2orf15
ARPC2	X		GPSM3	LINC01432
ARPC3	X		CAPN1	MIR187
ARPC5L	X		OGFOD2	ZNF805
ARPP19	X		SNORD115-36	PCDHA6
ARPP21	X		SNORD114-7	IDI2-AS1
ARRB1	X	X	SCARNA20	HPCAL1
ARRB2	X		TMEM109	WDR81
ART3	X		LINC01134	PRRX2-AS1
ARTN	X		TM4SF5	MIR3681HG
ASB13	X		CSAG1	SCARNA14
ASB7	X		LINC-ROR	SPATA32
ASCL1	X		AASS	LRIF1
ASF1A	X		LINC01163	LINC00602
ASF1B	X		MIR4293	ZNF212
ASGR1		X	CADPS	DLGAP1-AS4
ASGR2		X	NR5A1	NR2E3
ASL	X		COPS3	REEP4
ASNS	X		LCN12	CEP63
ASS1	X		MIR3179-4	ZNF816-ZNF321P
ATAD2	X		TMEM139	CEP97
ATF1	X		COA4	SPAG1
ATF3	X		DCAF12	SETMAR
ATF4	X		ZNF730	GFRA3
ATF6	X		STOML3	LINC01063
ATG10	X		BRIX1	MORN2
ATG4A	X		SP2	LINC01370
ATG4B	X		PPP1R35	RAB28
ATL2	X		ATXN7L1	ELMO1
ATOH8	X		HIST1H4G	MIR520C
ATOX1	X		LINC01615	KRT3
ATP1A1	X		LIN7C	MMP17
ATP1A3	X		PNKP	ZSCAN5B
ATP1B1	X		LINC01361	RORC
ATP1B3	X		OCLN	SUMF1
ATP2A1	X		METTL2A	KCNS3
ATP2A2	X		ZKSCAN7	MED29
ATP2B1	X		TMEM117	ARL2
ATP2B4	X		THEM6	LIN54
ATP2C1	X		OR5K2	LINC01347
ATP4A	X		ZCCHC24	DCD
ATP5A1	X		UTS2	AARD
ATP5B	X		SIGLEC16	RBM28
ATP5C1	X		CFAP44-AS1	MIR519C
ATP5D	X		CNBD2	BCCIP
ATP5E	X		LINC01505	UPK3BL
ATP5F1	X		TMEM114	MIR498
ATP5G1	X		REEP2	ATP1B4
ATP5G2	X		CHCHD3	HIST1H2AG
ATP5G3	X		EARS2	MIR6818
ATP5H	X		UGT1A7	TMEM220
ATP5I	X		MIR599	ZFR
ATP5J	X		CYP4Z1	NCOA2
ATP5J2	X		SNORD15B	RPRD1B
ATP5L	X		ZNF341	ARRDC2
ATP5O	X		NDUFA4L2	MBNL1-AS1
ATP5S	X		MIR3648-2	SLC39A11
ATP6AP1	X		MIR4424	OXLD1
ATP6V0A4	X		SFR1	CSAG4
ATP6V0B	X		EXOSC3	INAFM1
ATP6V0C	X		MIR6859-4	DIAPH1
ATP6V0D1	X		ATP2B2-IT2	PRKAG2
ATP6V0E1	X		ATP2A3	SOCS7
ATP6V1B1	X		MIR6893	MED20
ATP6V1C1	X		REXO2	DAPK1
ATP6V1D	X		TMEM255B	SNORA84
ATP6V1E1	X		HIST2H4A	FBXO11
ATP6V1F	X		RNA5S3	KAT8
ATP6V1G1	X		LTBP3	CSNK1G2-AS1
ATP6V1H	X		C12orf76	OPALIN
ATP7A	X		FLJ37505	MIR526B
ATP8B1	X		TMEM151B	CXorf67
ATP8B4		X	MIR4748	MIR576
ATRN	X		RECK	FOXP4-AS1
ATRX	X		RNF183	ZDBF2
ATXN1	X		DUSP15	CTSL
ATXN2	X		CIC	TDRD12
AUH	X		RHOC	CYP24A1
AURKA	X		SP7	GLT1D1
AURKB	X		MAGEB2	ZNF839
AUTS2	X		ARHGAP32	WDR53
AVL9	X		FAM50A	LINC01132
AVPR1A	X		KRT16	SPATC1L
AXIN1	X		LMCD1	MIR26A2
AXIN2	X		HYI	DNAJC6
AXL	X		WBSCR28	ATM
AZGP1	X		MIR6129	RLIM
AZU1		X	MIR3973	ATOH7
B2M	X		SHCBP1	GS1-600G8.3
B3GALT6	X		BECN2	CCL3
B3GAT1	X		FAM13A-AS1	GRXCR2
B3GAT3	X		ANKRD40	DHX29
B3GNT3	X		LINC00924	KRTAP4-3
B4GALNT2	X		ETFBKMT	ZC3H12C
B4GALT1	X		SSX9	CCNT2
B4GALT2	X		TMEM213	KIRREL3-AS2
B4GALT4	X		C2orf47	MIR5702
B4GALT5	X		KRT6B	BIN2
B4GALT7	X		EVI2A	SCARNA4
BACH2		X	DROSHA	LINC01584
BAG1	X		OR13G1	CXorf58
BAG3	X		MIR6715A	IQCF5
BAIAP2	X		LINC00852	STK32C
BAK1	X		TRIM49C	ZFP1
BANF1	X		C21orf59	LINC01297
BANK1	X	X	TMEM221	BCKDK
BARD1	X		UBE2Q2P2	SERF2
BARX2		X	ALS2CR12	CATIP
BASP1	X		RPRD2	RHOXF2B
BATF	X		FGF14	SGK3
BATF2	X		DOK2	PPP1R3A
BATF3	X		SNORA70	LRRC8A
BAX	X		SLC27A3	BACE1
BAZ2A	X		LILRP2	MIR1302-1
BBOX1	X		ZNF865	RANBP17
BCAM	X		MIR133B	DUSP16
BCAN	X		DPP7	ARNTL2-AS1
BCAP31	X		ZNF528	PPP1R12A
BCAR1	X		DOK3	TRNP1
BCAR3	X		DDX43	POLDIP2
BCAT1	X		WHRN	ASAH2
BCKDHA	X		NLGN4Y	TNFAIP8L3
BCKDHB	X		ANKMY1	GSTA5
BCL10	X		ZNF229	TRPC3
BCL11B	X	X	PEX5L-AS2	SCN4A
BCL2	X		ZNF561-AS1	KLC2
BCL2A1	X	X	KRI1	USP17L7
BCL2L1	X		ARHGAP30	MIR4633
BCL2L10	X		SNORD115-10	SLC36A1
BCL2L11	X		LINC01623	TMC2
BCL2L13	X		LINC00861	IFNW1
BCL2L2	X		SSUH2	MMD2
BCL6	X		TUNAR	LINC00678
BCL7A		X	SP100	LINC00424
BCR	X		DEFB104B	LINC01215
BDH2	X		MIR574	HOXB7
BDKRB1	X		MIR598	USP25
BDKRB2	X		KIAA1549L	CTPS2
BDNF	X		EIF3CL	ZNF337-AS1
BEND5		X	SLC22A16	ACTL7A
BEST1	X		GOLGA6D	TAS2R3
BET1	X		GRIK2	FKBP6
BFSP1		X	OVCH1-AS1	THAP3
BGN	X		CLEC2L	MIR509-2
BHLHE40	X		WEE2	ZNF608
BHLHE41		X	LCE2A	LRRC3B
BID	X		MYOM3	TRIM77
BIK	X		SPINK7	MIR4685
BIN1	X		DHX8	OR51B4
BIRC2	X		DCHS1	DEFA6
BIRC3	X	X	SLC19A3	MYBPC1
BIRC5	X		C5orf67	DDTL
BLCAP	X		KBTBD3	TSPY8
BLK		X	CORO1B	NAV2-AS2
BLVRA	X		EP400NL	KRTAP2-1
BLVRB	X		UBA6-AS1	CTB-12O2.1
BMF	X		SUMO4	HLTF
BMP1	X		KRTAP6-2	LEMD1-AS1
BMP2	X		LPGAT1	CTNNAL1
BMP2K	X	X	TUSC3	ESF1
BMP6	X		HS6ST3	CD300LF
BMPR1A	X		CGA	ZNF616
BMPR1B	X		FUBP3	STYK1
BMPR2	X		NLN	DNMT3B
BNIP3	X		PRR23D2	PCDHB12
BNIP3L	X		FOXS1	UBAC2-AS1
BOLA2	X		DNAJC5B	HACD2
BPGM	X		FAM83H-AS1	SLC6A10P
BPHL	X		SCARNA10	HULC
BPNT1	X		FRRS1L	RPS8
BRAF	X	X	HLA-DQB1-AS1	SNHG19
BRCA1	X		FRG2B	ERC2-IT1
BRCA2	X		ZBTB49	B3GALT1
BRDT	X		BHLHE23	ITM2A
BRF2	X		ANKRD65	SLC6A1-AS1
BRMS1L	X		SLF2	SLC22A2
BRPF3	X		TIGIT	PTGES3L
BRS3	X		NEUROD4	AOC1
BRSK2		X	ERICH6-AS1	MIR4466
BSG	X		MIR890	SMNDC1
BST1		X	MIR581	MIA
BST2	X		CLVS2	OR1M1
BTBD3	X		OR2G6	PEBP4
BTC	X		HIST1H4L	FOXP1-AS1
BTG1	X		LINC01493	DAND5
BTG2	X		ATE1-AS1	ARSH
BTG3	X		TMEM238	BSPH1
BTNL8		X	MIR657	OSBPL2
BTRC	X		PNLIPRP3	NKX2-1-AS1
BUB1	X		SIX2	TRAF3IP2-AS1
BUB1B	X		RNF212B	ARX
BUB3	X		TTTY13	WDR31
BYSL	X		UGT1A9	RRAS2
C11orf80		X	HSPB6	ALKBH3
C1orf54		X	DNAH12	GPRC5D
C1QA	X		ZNF550	LIAS
C1QBP	X		MED12	MRPS21
C1QC	X		CNTN5	TTLL8
C1R	X		RHBDL2	MIR4521
C1S	X		CASC16	GFAP
C2	X		RPS28	FER1L6-AS1
C3	X		SLC7A11-AS1	REV1
C3AR1	X	X	VCX	SNAP47
C4BPB	X		HIST1H2AB	MRPL39
C5	X		VEGFD	WRNIP1
C5AR1	X	X	C2orf74	EXOC3-AS1
C5AR2		X	RNF166	GUCY1A2
C8A	X		MIR4655	MIR6894
C8B	X		SAMD5	GAS2L1
C8G	X		MYO1B	THBS4
C9	X		KSR2	GHRLOS
CA1	X		EGFLAM-AS4	HEXDC
CA12	X		SNORA36C	LAPTM4B
CA2	X		DCBLD1	C2orf81
CA4	X		TBC1D5	EMG1
CA6	X		LYPD6B	MIR539
CA8		X	MIR6762	C9orf135
CAB39	X		TBL2	MLEC
CAB39L	X		RPN2	TAF1A
CACNA1A	X		BSN-AS2	TMOD1
CACNA1B	X		MIR5691	SMG8
CACNA1F	X		FBF1	CD27-AS1
CACNA1H	X		ZNF705B	ROBO1
CACNA2D2	X		ZNF263	ZFP62
CACNG1	X		CDKL3	MIR3120
CACYBP	X		CDR2L	MIR4437
CAD	X		SAP25	MYLK4
CADM1	X		EPGN	NEDD8
CADM2	X		UFSP2	CELF1
CADM3	X		BTF3L4	CCS
CALB2	X		RPLP2	OSR2
CALCB	X		MAP2K7	FLJ40194
CALCR	X		CCDC65	DRAXIN
CALCRL	X		PLEKHS1	ZNF174
CALD1	X		MIR6876	HNRNPA1L2
CALML5	X		YIPF2	DBH
CALR	X		LARGE2	OR5D13
CALU	X		SRGAP2C	SPATA17-AS1
CAMK1D	X		NXPE4	ZDHHC15
CAMK2B	X		MTHFD1L	BBIP1
CAMK4	X		MIR3189	CHRM1
CAMKK2	X		VPS33A	MIR3143
CAMP		X	MIR221	CES5A
CANT1	X		ZNF629	FOXI3
CANX	X		CLSTN2	PRKCSH
CAP1	X		ZNF607	BCL2L15
CAP2	X		LINC01015	GPRIN1
CAPG	X		KLHDC8B	PTDSS2
CAPN2	X		DHRS4-AS1	C15orf40
CAPN3	X		C6orf229	TESMIN
CAPN5	X		MIR128-1	DEFB118
CAPN9	X		EHD2	PRKD3
CAPZB	X		BOLA3-AS1	FAM162B
CARTPT	X		RPGRIP1	FAM163B
CASP1	X		ZNF317	FLAD1
CASP10	X		OR10K2	PGM5-AS1
CASP2	X		WDR62	KLHL5
CASP3	X		SLC17A7	DKK2
CASP4	X		LINC00838	MIR3171
CASP5	X	X	EPHB1	SPIRE2
CASP6	X		HPYR1	EPB41L1
CASP7	X		CST9	UFD1L
CASP8	X		MIR3192	CCDC136
CASP8AP2	X		ZFYVE9	LINC00083
CASP9	X		MIR3919	SMG1P7
CASQ1	X		CLPP	MIR5688
CASQ2	X		MIR4428	FAM127A
CAST	X		OR5B2	IL36RN
CAT	X		DIRAS2	C21orf91
CAV1	X		FAM19A2	FAM92A1P2
CAV2	X		RAPGEF2	ST7-OT4
CAV3	X		SNHG3	BICDL1
CBFA2T3	X		SNORD13	ZNF641
CBL	X		MGC15885	SNORD115-28
CBLB	X		FAM46B	MIR6877
CBR1	X		RNF151	SPATA12
CBR3	X		CATSPER2P1	SNORA4
CBR4	X		BNIPL	UBE2U
CBS	X		IFNL3	BCLAF1
CBX1	X		LINC01451	HIST2H2BF
CBX3	X		MRGPRE	KLK4
CBX8	X		LRRC17	PRICKLE3
CCDC102B		X	SACM1L	ZFYVE26
CCDC106	X		SNX21	EXOC3L4
CCDC28A	X		LPP-AS2	VSIG4
CCDC58	X		MCM3AP-AS1	NEU2
CCDC88A	X		MIR3156-2	CYYR1-AS1
CCK	X		PARM1	MIR5685
CCL1		X	OR4F13P	APLN
CCL11	X		F2RL3	CNR1
CCL13	X	X	NLRP9	ULBP3
CCL14		X	MAPK4	MIR5003
CCL17	X	X	INTS4P1	KIZ-AS1
CCL18		X	TLX2	FAM64A
CCL19	X	X	MIR100	OR2T5
CCL2	X		ZXDB	SCAI
CCL20	X	X	ELP2	MIR3141
CCL22	X	X	OXCT1	ZNF768
CCL23		X	ALX1	ZNF587B
CCL24	X		KEAP1	KRTAP5-1
CCL25	X		KCNJ15	PSG8
CCL4	X	X	CBFB	GKN1
CCL5	X	X	TPSB2	SPATA13-AS1
CCL7	X	X	CLMN	MBTD1
CCL8		X	RNVU1-14	KRT16P3
CCNA1	X		ZNF799	DPH3
CCNA2	X		SEC22C	FOXB2
CCNB2	X		RTF1	PI3
CCND1	X		KCNJ1	GTF2E2
CCND2	X	X	PRDM11	ENDOG
CCND3	X		UGDH-AS1	FAM205A
CCNE1	X		ACOD1	MIR4508
CCNF	X		GATA2	ZDHHC6
CCNG1	X		LINGO1-AS1	ITPK1-AS1
CCNG2	X		OLFM2	HNF1B
CCNK	X		GUCY2GP	OSTN-AS1
CCNL1	X		ZNF613	C4orf19
CCNO	X		KRTAP19-7	SAA2-SAA4
CCNT1	X		HAPLN1	MCM3AP
CCP110	X		NKPD1	HFE
CCR1	X		SLC35E2	PRDM12
CCR10		X	SNORD105B	TEX101
CCR2	X	X	ZNF385D-AS1	ESM1
CCR3		X	PACS1	C11orf91
CCR4	X		MSI1	RTCA
CCR5	X	X	CNNM1	MTRNR2L1
CCR6		X	LINC00871	MARCH9
CCR7	X	X	PICSAR	GPR176
CCR8	X		MAG	ZCCHC7
CCRL2	X		GTPBP2	MRPL44
CCT2	X		ZNF98	LPP
CCT3	X		CST4	C1orf61
CCT4	X		TPRG1L	OR2T27
CCT5	X		SPATA31D4	LINC00552
CCT6A	X		FKBP9	MIR4698
CCT6B	X		DOCK7	MIR3682
CCT7	X		ASB11	STEAP1B
CD14	X		ZNF678	INTS12
CD151	X		PIGV	MUM1L1
CD160	X	X	MORC3	TCP10L
CD180		X	RAP2A	CIPC
CD19		X	MIR8070	SLC38A5
CD1A		X	CCDC22	LBH
CD1B		X	C8orf48	ZNF557
CD1C		X	LINC00238	FAR1
CD1D	X	X	NSUN3	RANBP3L
CD1E		X	CTDNEP1	TTC4
CD2	X	X	ZFAND1	ACO1
CD207	X		PNRC2	SS18L1
CD209	X	X	VPS39	TVP23C-CDRT4
CD244		X	TAGLN3	TBX22
CD247	X	X	PLEKHA8	HEATR4
CD27		X	PCDHGA4	PRPH
CD274	X		REST	TEDDM1
CD276	X		PRRG1	XKR7
CD28	X	X	MLF2	SLC39A12-AS1
CD2AP	X		SIK2	CTD-2270F17.1
CD300A		X	A1BG	ZBTB5
CD302	X		MXRA7	TKTL2
CD33		X	SMARCC2	PAK5
CD34	X		C19orf24	LCN6
CD36	X		ZNF761	LINC00858
CD37	X	X	CEP85	RAB35
CD38	X	X	MINCR	OTULIN
CD3D	X	X	MIR4256	ZNF335
CD3E	X	X	REP15	RRP1
CD3G	X	X	ENKUR	SCAMP2
CD4	X	X	SERPINA7	TXNDC5
CD40	X	X	FZD9	ATF7IP2
CD40LG	X	X	MIR302C	ZNF589
CD44	X		TMIGD3	ZNF287
CD46	X		KCNH5	MMP26
CD47	X		NTS	KLHL13
CD48	X		NMNAT3	MIR1587
CD5		X	FAM138D	RIN2
CD55	X		F11R	MFSD12
CD59	X		CCDC74A	ZNF736
CD6		X	DEFB132	SNORA59B
CD63	X		ITM2B	PTGDR2
CD68		X	KRTAP10-9	EN2
CD69	X	X	LINC01142	SLF1
CD7	X	X	RNF115	ISLR2
CD70	X	X	PLXDC2	SLX1A
CD72		X	CACNA1C-IT2	GFRA4
CD74	X		NPHP3-ACAD11	CORO1C
CD79A	X	X	ARMC12	ZAN
CD79B	X	X	IGLL1	RTN2
CD80	X	X	EPB41L4A-AS2	PSD2
CD81	X		NSUN5	MICALL1
CD82	X		EGLN1	MAP2K1
CD83	X		BPIFB6	APOPT1
CD86	X	X	SNORD115-26	GPR158-AS1
CD8A	X	X	RNASE8	MIR4733
CD8B	X	X	WDR13	CCDC167
CD9	X		DNAJC25	S100A16
CD96	X	X	NBPF25P	DGCR6
CD99	X		BSN	C19orf84
CDA	X	X	OR10G7	ZNF473
CDADC1	X		SNORD2	JAKMIP2
CDC14B	X		LINC01393	CARNMT1
CDC20	X		TMEM62	DCTN2
CDC25A	X	X	POMZP3	ATRIP
CDC25B	X		OR2L3	C12orf73
CDC27	X		ZNF316	PPP4R4
CDC34	X		TRAF3IP3	SNORD114-25
CDC42	X		PITPNM2	TMEM177
CDC42BPA	X		ADAMTSL4	TGFA-IT1
CDC42EP1	X		CDC42EP3	FAM182B
CDC42EP2	X		GTF2IP12	CELA2B
CDC42EP4	X		ROPN1B	TAT-AS1
CDC42SE2	X		MATR3	SPAG11A
CDC45	X		PCDHGC3	RPUSD2
CDC5L	X		SSR4P1	SLC25A42
CDC6	X		MIR4743	MIR141
CDC7	X		GSAP	SNORD116-20
CDCA3	X		MIR3138	OR5B21
CDCA8	X		DYNC1I2	MIR6810
CDCP1	X		MIR1271	RNF121
CDH1	X		SPDYE2	GBA2
CDH11	X		ZNF431	FSIP2
CDH12		X	MIR4518	FAM134A
CDH13	X		BFSP2	ZNF350
CDH15	X		MESP2	SOHLH2
CDH16	X		N6AMT1	RPL5
CDH2	X		ABCF3	NDUFA11
CDH3	X		CERS6-AS1	MTERF2
CDH4	X		OGT	TCEAL2
CDH6	X		DIS3L2	BMP4
CDH8	X		ZNF654	INO80E
CDHR1		X	ADAMTS7	P3H3
CDK1	X		ZNF273	PKN2
CDK13	X		RABGGTB	SLC7A8
CDK2	X		RNF13	MAP3K15
CDK4	X		ZNF611	IRF2BP2
CDK5R1	X		LINC00967	CRYGB
CDK5RAP2	X		CENPO	MIR6891
CDK6	X	X	FLJ13224	TRIM61
CDK7	X		OR52B6	IREB2
CDK8	X		FAM72B	MPRIP
CDKAL1	X		DEFB129	TASP1
CDKN1A	X		CBY1	PIK3R1
CDKN1B	X		KLK6	BLOC1S4
CDKN1C	X		KMT2A	RIMBP3
CDKN2A	X		C19orf67	CCDC7
CDKN2AIP	X		DAPL1	TRHDE-AS1
CDKN2B	X		LINC00654	NCAM1-AS1
CDKN2C	X		MIR1260B	CT47A7
CDKN2D	X		TPTEP1	CNOT8
CDKN3	X		PPP1R12C	ADARB1
CDO1	X		VPS9D1-AS1	EHMT2
CDON	X		GGTLC2	PKD1L1
CDSN	X		HIST1H1E	PIGG
CEACAM3		X	FAM188A	SLC25A21-AS1
CEACAM8		X	RIOK1	ALPL
CEBPA	X		POTEC	ZNF22
CEBPB	X		MIR34C	PRKAR2A-AS1
CEBPD	X		LRRC26	ZNF16
CEBPG	X		MIR5700	OR4F17
CEL	X		PDZD11	RIN1
CELF2	X		FAM46D	OR7E24
CELSR1	X		NEGR1-IT1	MIR4780
CELSR2	X		MEIKIN	COMMD4
CEMP1		X	OR8D2	PLA2G4E
CENPA	X		SPATS2	SETD1B
CENPE	X		MIR3183	C20orf196
CENPF	X		ADM5	EFCAB5
CENPJ	X		ATAD1	MIR548BA
CENPM	X		TRIM44	USP17L12
CENPN	X		TAAR6	UBASH3B
CEP192	X		HIST1H3E	TRNT1
CEP250	X		TTTY5	SCO2
CEP57	X		MIR517A	DDX51
CEP72	X		PRR20E	PDCL2
CERCAM	X		LINC00607	MIR3197
CES1	X		TEX35	C2orf54
CETN2	X		FAM167A-AS1	GATB
CFB	X		ANO6	DUSP10
CFD	X		CFC1	IL11RA
CFH	X		MIR6870	SNORA71A
CFHR2	X		ZNF490	MMP19
CFI	X		SLC10A7	NHLH1
CFL1	X		HLA-DRB6	C1QL3
CFLAR	X		FLJ35934	KCTD18
CFP	X	X	AP3D1	PLPPR4
CFTR	X		RBPMS-AS1	MIR6865
CGRRF1	X		TTTY7B	FAHD2A
CH25H	X		ZCCHC16	MIRLET7C
CHAC1	X		KRT18P55	MAP10
CHAF1A	X		GALT	MITF
CHCHD10	X		AKIRIN1	MIR4532
CHEK1	X		INO80	WDR55
CHEK2	X		SUGP2	SNED1
CHFR	X		CECR7	EFNA2
CHGA	X		IFI27L1	RNU4ATAC
CHI3L1		X	ZACN	FCGR1CP
CHI3L2		X	ERICH3-AS1	NT5DC1
CHKA	X		OR51V1	MAGEL2
CHMP1A	X		KCTD14	CEBPA-AS1
CHPF	X		LINC00910	ADGRL1
CHPT1	X		MIR4666B	ZNF469
CHRM4	X		CDPF1	MIR4717
CHRNA1	X		MIR3199-1	MYRFL
CHRNA5	X		HS3ST3A1	BCORL1
CHRNB1	X		CNOT11	PRAMEF9
CHRNG	X		LINC00279	PAMR1
CHST1	X		NMNAT1	KATNAL2
CHST15		X	CAPN7	MIR4786
CHST2	X		TRPC1	ASB4
CHST3	X		C9orf131	TBC1D28
CHST4	X		FAM83C-AS1	SPIN2B
CHST6	X		SLC25A44	KCTD12
CHST7		X	SNORD116-13	PSMD5
CHST8	X		FNDC11	SFTA2
CHUK	X		KIAA0100	PIGS
CIDEA	X		SERPINB4	CEACAM22P
CIITA	X		MED12L	OR52W1
CIR1	X		NMB	MIR3621
CISH	X		CTU2	USP17L18
CITED2	X		FOXRED1	PIK3IP1-AS1
CKAP4	X		SNORD115-43	MIR3180-3
CKAP5	X		GIMAP4	UGT2A3
CKB	X		TMEM234	NDUFAF1
CKM	X		DNAJC18	TNXB
CKMT2	X		TYW5	ZNF544
CKS1B	X		MTCL1	NDUFAF3
CKS2	X		ARL16	ZBED1
CLASP1	X		CLDN25	LCA5
CLC		X	AMZ2P1	RND2
CLCA2	X		RFPL4AL1	ALMS1P1
CLCA3P		X	RWDD3	MEI1
CLCF1	X		MYO18B	FAM131B
CLCN2	X		MOAP1	THAP5
CLCN3	X		SNORD117	GPAT3
CLDN14	X		NSMCE3	CKAP2
CLDN15	X		CFLAR-AS1	MIR490
CLDN16	X		SPPL2B	MPZ
CLDN18	X		UGT1A3	DNAJC8
CLDN19	X		THOC6	NHLRC1
CLDN3	X		GUSBP3	PNLIPRP1
CLDN4	X		CYP21A1P	FLRT3
CLDN5	X		LINGO4	CCAR2
CLDN6	X		KLF8	NPPB
CLDN7	X		TMEM231	FAM71E2
CLDN8	X		MIR1912	SNORA48
CLDN9	X		WSB2	SNORD45A
CLEC10A		X	SLC25A45	LINC01473
CLEC2D		X	ULK3	KLKP1
CLEC4A	X	X	FAM160B2	TMEM79
CLEC5A	X		OVOL3	CTNNBL1
CLEC7A		X	CITED4	SDCBP2-AS1
CLGN	X		CARD8	GOLGA8F
CLIC2	X	X	DPP10-AS3	CATIP-AS1
CLIC3	X		SCN4B	SLC22A10
CLIP1	X		CCDC13	XRRA1
CLIP2	X		PPBPP2	PCDHB3
CLN5	X		FAM196A	RPL37
CLN6	X		CST2	MIR1202
CLNS1A	X		FAM103A1	RAB39A
CLP1	X		MIR1827	SFSWAP
CLPB	X		SEC14L4	GNA13
CLPS	X		MIR7160	OR3A2
CLSTN3	X		MAFG	ASB9
CLTA	X		GBAS	MIR7106
CLTB	X		TIMM23B	LINC01166
CLTC	X		PTPN18	NHLRC3
CLVS1	X		GPR52	B3GNT8
CMA1		X	GLTP	PGRMC2
CMBL	X		OR2J2	GLIS3
CMKLR1	X		MIR3939	AARS2
CMPK1	X		GPR148	SLC26A8
CMPK2	X		CSN1S1	LINC01376
CNBP	X		TBKBP1	FAM47E-STBD1
CNDP2	X		CHCHD7	HAVCR2
CNIH2	X		CIB1	KRT85
CNN2	X		LINC00051	TUSC8
CNN3	X		GOLGA2	RHPN2
CNOT2	X		AURKC	HEATR9
CNOT4	X		RAB6C-AS1	LINC01050
CNOT6	X		PTN	EYA3
CNP	X		MIRLET7F1	ZDHHC19
CNTFR	X		WFDC21P	SNAPIN
CNTN1	X		GAS5	PRC1-AS1
CNTRL	X		TBCE	S1PR1
CNTROB	X		TOX3	SLC25A29
COCH	X		PLXNA1	UBR2
COG2	X		MIR512-2	SPRYD3
COIL	X		ANGPTL7	MICAL1
COL11A1	X		RPL29P2	BCO1
COL12A1	X		KIAA1210	C19orf81
COL15A1	X		PRX	THPO
COL16A1	X		SERP2	GDF2
COL1A1	X		KIF21B	TMEM30B
COL1A2	X		MARC2	THEMIS2
COL2A1	X		LINC00365	UCP1
COL4A1	X		ZNF569	CCL21
COL4A2	X		SMYD3	SPTLC1
COL5A1	X		B4GALNT3	TRMT10B
COL5A2	X		TRIM73	LRFN4
COL5A3	X		KRTAP11-1	CRYGN
COL6A1	X		ZNF385A	ACIN1
COL6A2	X		ULK4P2	ZFYVE16
COL6A3	X		LRRC38	FERD3L
COL8A2	X	X	ZNF890P	SNORD36C
COL9A1	X		ZNF311	KRTAP15-1
COLQ		X	PYGO2	TM2D3
COMP	X		GRIN2B	ASCC2
COPA	X		RBMY2EP	MIR328
COPB1	X		FMO9P	RFXANK
COPB2	X		ZNF333	SGIP1
COPE	X		CCDC88B	PSMA5
COPS5	X		LINC00639	KAT7
COPZ2	X		PROSC	GSX1
COQ3	X		MIR3168	RESP18
COQ5	X		CRACR2A	MIR4514
COQ9	X		NBPF15	PLCXD1
CORO1A	X		SNORA9	SPESP1
COX10	X		ZNF474	MIR23B
COX11	X		SLC4A5	MIR4790
COX15	X		LINC00261	RAB33B
COX17	X		GDPD3	LINC00317
COX4I1	X		DHX32	MIR30C2
COX5A	X		CACTIN	ZSWIM2
COX5B	X		CPLX4	FTX
COX6A1	X		SNX27	DISP2
COX6A2	X		PUS3	B9D2
COX6B1	X		ARHGAP8	ACTL6A
COX6C	X		NKTR	NUAK2
COX7A1	X		RNF216-IT1	GHRHR
COX7A2	X		TUBG2	LINC00845
COX7A2L	X		OR4F29	MIR6794
COX7B	X		TMED1	SNX18
COX8A	X		ALG1L2	FAM109A
CP	X		EPN3	SSX3
CPA2	X		SF1	RGS21
CPA3		X	PSMD4	OR10AD1
CPB1	X		TAF9B	ADAMTS14
CPB2	X		PRM3	TRPT1
CPE	X		LINC01206	LINC01330
CPEB2	X		CCDC190	CLPX
CPEB3	X		MIR340	EXOC8
CPM	X		NLRP13	NAA50
CPN1	X		SLC4A7	MIR136
CPOX	X		HIRIP3	RPL21
CPT1A	X		LINC00868	TFB1M
CPT2	X		TMEM88B	KIAA0895
CR1	X		NUDCD3	EIF3H
CR2	X	X	BROX	RGS3
CRABP1	X		MIR1205	ZP3
CRABP2	X		ZNF208	XKR5
CRAT	X		STX2	PSMF1
CRB3	X		LARGE-AS1	MOB3A
CREB5		X	MIR9-1	ARID3C
CREBBP	X		HN1L	SRRM3
CREG1	X		SNORD115-42	CNTNAP2
CRIP2	X		RMI2	NUP62
CRIPAK	X		RNF167	ELOVL7
CRISP2	X		UBTF	C11orf84
CRISP3		X	CDK11B	PDE3A
CRLF1	X		MTMR8	PAPOLG
CRLF2	X		MIR6774	KIAA1841
CRMP1	X		UBE2D2	ARL5A
CROCC	X		CNNM3	C22orf23
CROT	X		LINC01216	CELF4
CRP	X		EEF1G	C5orf47
CRTAM	X	X	FANCE	TRPM2
CRYAB	X		MATN1	PITRM1-AS1
CRYBB1		X	HRAT92	DTX2P1-UPK3BP1-PMS2P11
CRYZ	X		AMTN	MC3R
CS	X		MIR3680-1	MIR4459
CSAD	X		MIR518B	UROC1
CSE1L	X		SNX29	T
CSF1	X	X	WNT10A	DESI2
CSF2	X	X	PRPF4	ATP5L2
CSF2RA	X		ZNF747	RNA5S6
CSF2RB	X		MIR4432	CAPZA3
CSF3	X		ZFAND2A	RNY3
CSF3R	X	X	SNORD3B-1	BEAN1
CSK	X		ZNF627	CMTM4
CSNK1D	X		LINC00994	PSME4
CSNK2A2	X		TPO	ADCY10P1
CSNK2B	X		PHC3	TRMT12
CSRNP2	X		LIFR-AS1	SERPINI1
CSRP1	X		BRSK1	MIR603
CSRP2	X		DAOA-AS1	ZSWIM3
CSRP3	X		ABHD14A	LRRC8B
CST7	X	X	SLC18B1	MIR590
CST8	X		SLC22A25	CCDC122
CSTF2	X		CGGBP1	BAIAP3
CSTF3	X		MIR377	MBLAC2
CTBP1	X		SLC1A7	AREL1
CTCF	X		ZNF25	FLJ42102
CTF1	X		WBSCR22	OR5H6
CTGF	X		C11orf57	C20orf27
CTH	X		ADAMTS19-AS1	MIR4477A
CTHRC1	X		MIR3186	PREPL
CTLA4	X	X	ZNF140	SRRM2-AS1
CTNNA1	X		TAAR9	KPRP
CTNNB1	X		PRMT8	OR4N3P
CTNND1	X		ZNF790	FIBIN
CTNS	X		RN7SK	CCDC174
CTSB	X		MIR4263	C14orf80
CTSC	X		GDF1	TMEM161B
CTSD	X		MRPL48	MIR1910
CTSE	X		RBM12B	MED30
CTSF	X		SMPD4	SI
CTSG		X	PGM2L1	FMR1-AS1
CTSH	X		DYNLRB1	MAD2L2
CTSK	X		MIR6750	DCAF12L2
CTSO	X		ZNF660	LINC00398
CTSS	X		GALNT4	MRPL50
CTSW		X	CLIP4	TEX13C
CTSZ	X		STPG1	MIR548BB
CTTN	X		MAGEB3	MIR4275
CUL1	X		LINC00570	SLC9B1
CUL3	X		2003-09-01	TBCEL
CUL4A	X		ZFP57	TECPR1
CUL5	X		PPID	CCDC175
CX3CL1	X		RECQL5	SULT1C4
CXCL1	X		FUOM	NACAD
CXCL10	X	X	KIF1C	GALNT2
CXCL11	X	X	ALG10B	LINC00271
CXCL12	X		PPP4R3A	LINC00939
CXCL13	X	X	C1orf21	ALG13
CXCL14	X		WDR61	AGT
CXCL16	X		ACP7	FBXL4
CXCL2	X		ZNF843	HIST2H2AB
CXCL3	X	X	RHBDF1	ARHGEF38-IT1
CXCL5		X	TMEM38A	LY6G6D
CXCL6	X		MRGPRX1	EVPLL
CXCL9	X	X	DCTD	PET117
CXCR1		X	PLEKHO2	PLXNA2
CXCR2		X	CCDC152	ALKBH5
CXCR3	X		DEFB106A	DNAI2
CXCR4	X		KIF13A	NDUFS5
CXCR5		X	C15orf62	RASA4B
CXCR6	X	X	DSTNP2	ZFPM1
CXorf57		X	TTLL10	RPS7
CXXC1	X		PLIN4	OR6C76
CYB5A	X		CHSY1	OR10H4
CYB5B	X		UNC5B-AS1	CDX1
CYB5R1	X		BPTF	CYLC2
CYB5R3	X		NUDT1	MCRS1
CYBB	X		CACNG6	HCAR1
CYC1	X		TMEM206	MIR6880
CYCS	X		MIR554	PTPRD-AS2
CYFIP1	X		PLCZ1	LINC00977
CYFIP2	X		MIR1302-3	MIR2392
CYLD	X		LAMTOR2	TMEM232
CYP11B2	X		USP17L20	OR4D5
CYP17A1	X		ORC3	MEX3C
CYP1A1	X		LRP5L	PRR5
CYP1A2	X		SNORD115-2	MIR6089
CYP26A1	X		PUS7	GUF1
CYP26B1	X		CORO2A	FA2H
CYP27A1	X	X	CHMP2A	KCNAB1
CYP27B1		X	ZCCHC6	GLMP
CYP2C18	X		MIR193A	FCF1
CYP2E1	X		FXYD2	SNORD56B
CYP2J2	X		FHL5	USP34
CYP2S1	X		OR11L1	NOX4
CYP39A1	X		LINC01492	CXCL17
CYP46A1	X		HIST1H4F	SNORD115-23
CYP4A11	X		TNK2	MSC-AS1
CYP4A22	X		LINC01176	SLURP1
CYP4B1	X		ALDH4A1	MOV10L1
CYP4F11	X		MIR548H5	SNORD113-4
CYP4F2	X		KLHL35	MEOX2
CYP51A1	X		C12orf60	SMIM10
CYP7A1	X		NRBP1	PCDHB17P
CYP7B1	X		C2CD4A	CCZ1B
CYP8B1	X		PRNT	TMEM101
CYR61	X		SLC25A25	LINC00332
CYTH2	X		PPIL4	TBC1D13
D2HGDH	X		CASC11	DUS1L
DAAM1	X		MED1	PCF11
DAB2	X		CEP83	FCRL3
DACH1		X	NELL1	PHEX-AS1
DAD1	X		NEU1	TAS2R38
DAP	X		SNORA38B	HDAC8
DAP3	X		ART4	DYNC1LI1
DAPK2	X	X	AP1M1	PAK2
DAPP1	X		PJA2	SARNP
DARS	X		CCZ1	RAB8B
DBF4	X		MIR4777	SNORA8
DBI	X		EFCAB2	ADAT1
DBP	X		MED4-AS1	FRMD5
DBT	X		DNAJC22	HCFC2
DCAF10	X		KRTAP6-3	CYP4V2
DCAF11	X		KRTAP4-4	UGT8
DCBLD2	X		FAM227A	LRRC30
DCC	X		TBX18-AS1	URM1
DCK	X		CNGA3	FCGRT
DCLRE1B	X		MIR520F	PDE6H
DCN	X		NCF1C	PCDHGA1
DCP1A	X		DNAH5	SLC16A12-AS1
DCP2	X		TRIM40	TRIM65
DCPS	X		SNORA52	MIR514A1
DCSTAMP		X	CENPV	DNPH1
DCT	X		MIR3131	A1BG-AS1
DCTN1	X		FAM155A	MIR3065
DCTN4	X		FOXK1	MCCD1
DCTPP1	X		LRRC10B	SEL1L
DCUN1D1	X		EBF1	ARHGEF28
DCX	X		BAALC-AS1	TOM1
DCXR	X		STARD6	TRAF6
DDAH1	X		MAPK8IP1	BECN1
DDAH2	X		STRC	BORCS6
DDB1	X		CISD3	C5orf45
DDB2	X		RFX3	NHSL1
DDC	X		MIR1255B1	MIRLET7G
DDIT3	X		FAM21A	SCOC
DDIT4	X		SNORD45B	GNPDA2
DDX10	X		DAZAP1	MIR135B
DDX18	X		FRA10AC1	USP48
DDX21	X		FUCA2	JRKL
DDX25	X		OTUD6B	RPAP2
DDX39A	X		TMEM191A	GLTSCR2
DDX4	X		TUBA1A	UXT-AS1
DDX58	X		MRPL13	MIR4762
DDX60	X		DDOST	POU5F1
DECR1	X		FAM20C	STK31
DEF6	X		GGN	SERPINB1
DEFA4		X	ZNF681	GFOD1
DEGS1	X		OR4C16	NKAPP1
DEK	X		CAND2	DFFB
DENND5A	X		KRT9	FAM189A2
DENND5B		X	DNAJB6	USP47
DEPDC1	X		ZNF454	CLHC1
DEPDC5		X	CLEC1B	TM9SF4
DEPTOR	X		HLA-DPB2	LINC00485
DES	X		BLM	CALHM2
DFFA	X		EME2	MIR548AZ
DFNA5	X		MCTP2	SNORA14A
DGKA	X	X	SHANK1	MIR183
DGKG	X		HIBADH	LINC01281
DGKH	X		MIR182	CRY2
DGUOK	X		MIR4298	AKAP17A
DHCR24	X		TEX38	NAF1
DHCR7	X		PUF60	USP17L24
DHFR	X		GCC1	RPS6KB1
DHPS	X		PROSER2	KIAA1644
DHRS1	X		CMTM1	CC2D2A
DHRS11		X	PRR21	UMOD
DHRS2	X		MIR4429	C17orf98
DHRS3	X		SLFN12L	GID4
DHRS7	X		ALOX12-AS1	IL31
DHRS7B	X		OTOL1	CT45A7
DHX15	X		NKX2-8	HTATSF1
DHX16	X		LPIN3	LHFPL3-AS2
DHX58	X	X	MIR380	STK17A
DIABLO	X		RNPEP	TRAK1
DIAPH3	X		MIR4319	RFX2
DIO1	X		EDDM3A	NUTM2B
DIO2	X		NUDT16P1	MIR6857
DKK1	X		RSC1A1	SNORD1A
DKK4	X		WEE2-AS1	MIR548AE2
DLAT	X		MIR2054	SIGLEC9
DLC1	X		TBX15	TCERG1L
DLD	X		SNX13	PSORS1C1
DLG1	X		C1D	MFN1
DLG4	X		PAAF1	NKIRAS2
DLG5	X		RC3H2	XPNPEP3
DLGAP5	X		NUDT16	C19orf66
DLK2	X		PRPSAP1	LYRM7
DLL1	X		EDNRB	FAM107A
DLST	X		TRPM5	MCHR2
DMC1	X		SIRPD	DOCK8
DMD	X		LINC00254	OTUD7A
DMP1	X		SOX11	IFNE
DMPK	X		MIR548AQ	LYZL2
DMRT1	X		LINC00589	TRPS1
DNAJA1	X		NEO1	AP5S1
DNAJA4	X		MIR4267	ODF4
DNAJB1	X		ACSM5	TPRN
DNAJB4	X		PCMTD1	MIR124-3
DNAJB8	X		GFOD2	MIR548O2
DNAJB9	X		ADNP	SDCCAG3
DNAJC1	X		TMPRSS15	PPY2P
DNAJC12	X		DCAF8L1	PCDH9
DNAJC15	X		MIR450A1	NF1P2
DNAJC3	X		MPPE1	ARHGEF17
DNM1L	X		VPS37A	KCNE1
DNMBP	X		MIR941-2	BIRC6
DNMT1	X		RPL15	MIR4273
DNTT	X		TNRC18	TMEM8A
DNTTIP2	X		PACS2	MIR520D
DOCK10	X		MIR521-1	NKILA
DOCK2	X		PDCD10	LINC01568
DOCK4	X		SULF1	SLC22A14
DOCK9	X		HARS	LRRC4C
DONSON	X		SETBP1	CBY3
DOPEY1	X		C12orf75	RNFT2
DPEP2		X	CCDC38	NOP58
DPEP3	X		PLA2G10	PTPRZ1
DPP4	X	X	SKOR2	SNX4
DPYD	X		IFT22	MFAP2
DPYSL2	X		C2orf49	LRRC1
DPYSL3	X		MIR514A3	B3GALT5-AS1
DPYSL4	X		RABAC1	P2RY12
DR1	X		KISS1	PXN-AS1
DRAM1	X		PLEKHA2	CEP152
DRAM2	X		CPNE7	TJAP1
DSC1	X	X	TMEM51-AS1	MAP3K3
DSC2	X		TMOD4	PLET1
DSC3	X		SFTPB	DANT2
DSCC1	X		MDM1	EVI5L
DST	X		FAM25A	GHSR
DTNA	X		MIR493	FRS2
DTNB	X		SNRPN	ASB18
DTX1	X		COMTD1	RBAK
DTX2	X		SYCE3	NOX5
DTX4	X		C1orf198	MIR6738
DTYMK	X		TRIM55	C11orf42
DUSP1	X		MIR3616	ATP5J2-PTCD1
DUSP14	X		PSD4	TMEM37
DUSP2	X	X	CYB5D2	MIR527
DUSP3	X		CSTF1	RCBTB2
DUSP4	X		CYP1B1	LRRC4
DUSP5	X		SLC38A11	TBC1D3P5
DUSP6	X		RHOXF1P1	MACC1-AS1
DUT	X		MIR3199-2	GABRD
DVL2	X		PPP2R2D	ATP6V1G2-DDX39B
DYNC1H1	X		KCNJ10	LINC00466
DYNLL2	X		SNAP25-AS1	MIR152
DYNLT3	X		MPP3	BOD1
DYRK1A	X		LINC01003	OSBPL3
DYRK2	X		MUS81	FBXL13
DYRK3	X		FLJ45079	AGBL2
E2F1	X		MIR617	SNORD41
E2F2	X		ZBTB45	SREBF1
E2F3	X		TACO1	MGAT4C
E2F4	X		MTFP1	ZNF777
E2F5	X		IRF3	RIMBP2
E2F8	X		OTUD6A	LINC01375
EAF2		X	SENP5	LINC00189
EBI3	X	X	MIR25	ZNF142
EBP	X		BAIAP2L1	BCL2L12
ECD	X		SMG6	UGT2B10
ECH1	X		MIR218-2	HOXB-AS3
ECHS1	X		SOX1	MORN1
ECI1	X		SMUG1	SRRT
ECI2	X		MAGEE2	CCDC17
ECM1	X		C1orf52	CT45A1
ECM2	X		ANKUB1	DPH5
ECSIT	X		FBXO8	INO80B
ECT2	X		CPLX1	UBE2E1-AS1
EDAR	X		GNPTG	LRRC41
EDC4	X		C2-AS1	SYTL3
EDEM1	X		SNORD116-16	RGL2
EDF1	X		PGAP1	SLC35C2
EDIL3	X		RPF2	NT5C1B
EDN1	X		KHDRBS2	TM4SF1-AS1
EDN2	X		EPN1	UGT2B4
EEF1B2	X		SLC9A8	SFT2D1
EEF1E1	X		TXNDC9	FAM98A
EEF2	X		ZPBP2	LINC00885
EFEMP1	X		KRTAP5-8	GRAMD4
EFEMP2	X		MIR4764	SOX13
EFHC1	X		MIR1298	FIP1L1
EFHD1	X		ASTN2-AS1	SRSF11
EFNA1	X		ZNF718	VPS36
EFNA3	X		PROX1	ZNF20
EFNA5	X	X	CUZD1	RPPH1
EFS	X		OR4F16	SLC6A20
EGF	X		C8orf46	YIPF5
EGFR	X		VTRNA1-1	DNAL1
EGLN2	X		HMGN5	ABCA7
EGLN3	X		ENTPD4	C1orf162
EGR1	X		CCDC144A	PRSS45
EGR2	X	X	LRRK2	FAM175B
EGR3	X		ZNF429	UNC13D
EHD1	X		GID8	VPS52
EHHADH	X		POMK	MIR6776
EI24	X		SNORD115-35	LINC00656
EIF1	X		DPPA2	MS4A12
EIF1AX	X		AMY2B	DPY19L4
EIF1B	X		HHIP-AS1	ALDH16A1
EIF2AK1	X		RSPO1	FAM71B
EIF2AK2	X		HOXC-AS3	RPL13AP20
EIF2AK3	X		MIPOL1	TEX43
EIF2S1	X		LAPTM4A	MIR6790
EIF2S2	X		HPN-AS1	SLC22A3
EIF2S3	X		RAB25	MMP27
EIF3A	X		ZFR2	LCE3B
EIF3B	X		PRDM8	SHANK2
EIF3D	X		TMED11P	LMLN
EIF3J	X		SLC1A6	ATP11A
EIF4A1	X		LRRC27	TICAM2
EIF4A3	X		OR8H2	KBTBD8
EIF4E	X		KCTD21	IGSF11
EIF4E3	X		LINC00403	LINC00211
EIF4EBP1	X		LHFP	TWIST1
EIF4G1	X		SLC8A1	IGFL3
EIF4G2	X		PLEKHN1	FAM213A
EIF4G3	X		NAGA	PIGA
EIF4H	X		GPR150	TPRG1
EIF5	X		RAB18	CYP3A5
EIF5A	X		MIR151A	CFAP99
ELANE	X	X	THUMPD3-AS1	HSPBP1
ELF1	X		ALS2CR11	BRCC3
ELF3	X		MIR6745	CCDC42
ELF4	X		LINC00837	PFN4
ELK4	X		SLC7A4	LINC00304
ELL	X		EEF1A1	ST20-MTHFS
ELL2	X		CDH26	LINC00628
ELMOD3	X		FRMPD4	SLFN5
ELN	X		MICALL2	COG5
ELOVL2	X		EDEM2	HES3
ELOVL3	X		C14orf132	NECTIN2
ELOVL5	X		NELL2	ADAD2
ELOVL6	X		SULT1A2	OR2T34
ELP4	X		MATN4	CCKAR
EMP1	X		ANXA6	RHEB
EMP2	X		BORCS8	DAGLA
EMP3	X		SDR16C5	ST20
ENDOD1	X		SSTR3	ZNF239
ENG	X		CCBE1	CALY
ENO1	X		ZDHHC21	ZNF530
ENO2	X		GSTA1	SCARNA23
ENO3	X		NBR2	MIR548H2
ENPEP	X		SLC35F3	ACER2
ENPP1	X		KDM1A	NAIP
ENPP2	X		LINC01191	DLEU7
ENTPD5	X		KIAA1324L	LINC01123
ENTPD7	X		LINC00293	KCNS2
EOMES	X		ARL4C	AKIRIN2
EPB41	X	X	ACE2	PLB1
EPB41L2	X		CATSPER1	NECAP2
EPB41L3	X		PIK3C3	SNORD114-21
EPB42	X		ATP6V1B1-AS1	OR52E8
EPCAM	X		MIR4670	LINC00092
EPHA1		X	MIR1299	LINC00336
EPHA2	X		PRMT6	MORF4L1
EPHA5	X		LINC01102	CCDC189
EPHB2	X		RELT	RPL7
EPHB3	X		MIR4283-2	RRP15
EPHB4	X		LAMB4	KLHL12
EPHX1	X		FAM71F2	HOXB4
EPHX2	X		FAM9A	C19orf60
EPN2		X	LINC01419	HLCS
EPOR	X		DCDC2C	SLC35F4
EPRS	X		THAP10	ZNF682
EPS8L2	X		RFXAP	MIR548X
EPSTI1	X		LIPC	MIR8061
ERAP2	X		PITX1	ZNRD1ASP
ERBB2	X		GATA6	THRA1/BTR
ERBB3	X		ZNF598	DEFB133
ERCC1	X		SERPINA2	EMC8
ERCC2	X		TMEFF2	DEFB126
ERCC3	X		PFDN5	UBE2NL
ERCC4	X		FAM120AOS	MIR769
ERCC5	X		ZNF70	TMCO3
ERCC8	X		SSBP4	FER1L4
EREG	X		HDAC4	PAQR7
ERGIC3	X		MIR8058	RNF32
ERH	X		SLC6A1	SOAT1
ERMAP	X		SRGAP2-AS1	SNORD83B
ERN1	X		GRPEL2-AS1	STARD8
ERP29	X		MIR4716	GRM5-AS1
ERRFI1	X		ZNF711	MIR4526
ESPL1	X		SBK1	CNTLN
ESR1	X		TMPRSS5	PI4K2A
ESR2	X		C5orf34	ANP32B
ESRRA	X		LINC00309	SNORD36B
ESYT1	X		PFAS	RAP2C-AS1
ETF1	X		SFXN5	MIP
ETFA	X		LINC00222	METTL21B
ETFB	X		IYD	MIR4637
ETFDH	X		MIR762HG	C17orf51
ETHE1	X		MYCNUT	LINC01480
ETS1	X	X	TOR4A	GPR153
ETS2	X		ARHGEF7-AS2	EMID1
ETV1	X		MIR6859-3	GSG1L
ETV3		X	NPHP3-AS1	CCDC151
ETV4	X		CUTA	OR9Q2
ETV5	X		HMGXB3	ELFN1
EVI5	X		CLEC4M	LINC01087
EVL	X		OSGEPL1	CLDN17
EWSR1	X		KRTAP5-9	PCK2
EXO1	X		GTF2I	MMP28
EXOC2	X		ABHD11-AS1	OR1G1
EXOC4	X		P2RY6	SMYD5
EXOSC1	X		KCNJ18	AHDC1
EXOSC10	X		SNX5	UNC93B1
EXOSC2	X		DAAM2	UTP14A
EXOSC5	X		ANKRD39	LINC00244
EXOSC7	X		DTWD1	DNAH1
EXOSC8	X		DIAPH2-AS1	FAM131A
EXOSC9	X		PLGLA	TAS2R10
EXT1	X		CYP2D6	NUTM2B-AS1
EXT2	X		RAD51D	FANCI
EZH1	X		ETV7	PTP4A1
EZH2	X		LINC01024	GTF3A
EZR	X		LHFPL5	HTR3D
F10	X		FAM72C	FAM212A
F11	X		MIR941-5	THOC1
F12	X		LINC00870	TADA2A
F13A1	X		TCP11L2	GOLGA2P5
F13B	X		DSTN	NFIX
F2	X		CNPY4	ETV2
F2R	X		SMIM4	SPATS2L
F2RL1	X		UBAP1	ARL17A
F2RL2	X		OR1I1	MIR6724-1
F3	X		ARL6	DEAF1
F5	X		MIR516A2	CCDC107
F7	X		SNORD114-15	MIR760
F8	X		IDH1-AS1	PLEKHA7
F9	X		KIAA1324	LINC01498
FABP1	X		IGSF21	METRN
FABP2	X		TBX20	SCRN3
FABP3	X		ZNF300	MTRNR2L5
FABP4	X		YY1AP1	CHMP4A
FABP5	X		USP50	MIR3198-1
FABP6	X		GIPC2	CT47A11
FADS2	X		FAM24B	TMED6
FAH	X		PDCD2	NKX6-3
FAM102A	X		KCND2	TEPSIN
FAM120A	X		TAS2R46	ADGRF1
FAM124B		X	YIPF4	MEI4
FAM126B	X		PSTPIP2	HMG20B
FAM129A	X		PRAMEF26	KCNMA1-AS2
FAM134B	X		ENPP3	SH2D6
FAM162A	X		KRTAP21-1	PI4KAP2
FAM174B		X	LRP8	SPNS3
FAM179B	X		LENG9	SNAPC3
FAM198B		X	GABRG3	ZNF624
FAM46A	X		TMEM159	TMEM144
FAM46C	X		KRT33B	MIR1323
FAM63A	X		TMOD3	SLX4IP
FAM65B		X	KRT6A	IQCJ
FANCC	X		ZNF788	ZNF618
FAP	X		TAF1L	MIR606
FARP1	X		SFMBT2	INO80B-WBP1
FARSA	X		IGF2BP2	ZNF184
FAS	X		TAOK3	MIR6885
FASLG	X	X	MIR4320	ABHD5
FASN	X		C11orf16	MCOLN1
FBL	X		ZNF253	KCTD15
FBLN1	X		CECR3	CASC4
FBLN2	X		GLI3	MIR4639
FBLN5	X		UTP14C	MIR569
FBN1	X		TYW3	MIR578
FBN2	X		CBWD2	C10orf2
FBP1	X		SLC22A23	BZW1
FBP2	X		SNHG21	NUTM1
FBXL8		X	FAIM	METTL21EP
FBXO34	X		SNORA56	NRAV
FBXO4	X		ATP1A1-AS1	LINC00896
FBXO5	X		POTEG	OR8K1
FBXO6	X		MOG	FAM111B
FBXO7	X		PYCRL	GPR31
FBXO9	X		DNMT3A	PRAMENP
FBXW11	X		AP1G2	NT5C2
FBXW7	X		LINC01278	CD300LD
FCER1A		X	MED11	PAGE2B
FCER1G	X		RPL41	PPFIA3
FCER2		X	SIX3-AS1	SNORD91A
FCGR1A	X		ZBTB11-AS1	TXLNA
FCGR2B	X	X	CA5BP1	C1orf159
FCGR3B		X	MIR4305	MIR98
FCN1	X	X	SNORD116-5	CTDP1
FCRL2		X	INO80C	FOXD4L4
FDFT1	X		FBXO2	C3orf20
FDPS	X		C7orf50	TRIP12
FDX1	X		KMT5A	UCHL1-AS1
FDXR	X		EGR4	OR4K17
FECH	X		HIKESHI	MGAT3-AS1
FEN1	X		MIR3648-1	RGAG4
FERMT2	X		ZPR1	RNU105C
FES	X	X	PGM5P2	LGI2
FETUB	X		TNFAIP8L2	TMEM108
FEZ1	X		TMEM92	RNA5S5
FFAR2	X	X	MIR4295	FAM212B-AS1
FGA	X		CRTC3-AS1	ASCC1
FGD4	X		SNORD3D	LINC01447
FGD6	X		MIR3915	DKFZP434K028
FGF13	X		KLF11	C7
FGF16	X		PDZD4	ARHGAP9
FGF17	X		SETDB2	CRADD
FGF18	X		HLTF-AS1	TREX2
FGF2	X		CERS6	LRRC31
FGF22	X		HPR	MRPL46
FGF6	X		DPP3	ACTR10
FGF9	X		GALNT18	NPTX1
FGFR1	X		SNORA35	SNORD115-22
FGFR3	X		TTBK1	CEACAM19
FGG	X		LINC01173	CCDC78
FGGY	X		PRR27	DPCR1
FGL2	X		CHML	MIR375
FGR	X		TAS2R13	RNA5S12
FH	X		CNRIP1	DOCK11
FHL1	X		FAM196B	RNU5B-1
FHL2	X		MLC1	CMC2
FIS1	X		ASMT	SHROOM3
FJX1	X		MAEL	SYT9
FKBP14	X		COL11A2	SNORD116-8
FKBP1B	X		SPX	SNORD127
FKBP2	X		TRMT10A	SLC30A6
FKBP4	X		SERPINA12	LINC01426
FKBP5	X		PRKACG	MIS12
FLII	X		WNT11	FOXL2
FLNA	X		COASY	SCART1
FLNB	X		STEAP3-AS1	MT1G
FLNC	X		SIK3	IQSEC2
FLOT2	X		TSSC4	ANKRD1
FLT3LG	X	X	MIR4278	DDX52
FLT4	X		CALCOCO1	ADAMTS6
FLVCR2		X	MIR370	LMOD1
FMO1	X		SCRN2	CCDC70
FMO3	X		KCNJ3	SNHG18
FMOD	X		TMEM207	TEKT5
FN1	X		INTS6-AS1	METTL22
FN3K	X		PMEL	UBALD1
FNTA	X		THADA	NRGN
FOS	X		TSTD1	CNST
FOSB	X	X	LPCAT2	MACC1
FOSL1	X		MIR483	SPTSSA
FOSL2	X		TTC6	OR5B3
FOXA2	X		OR52J3	UBE2Z
FOXC1	X		LINC01033	CHMP5
FOXC2	X		KIF24	ENHO
FOXJ2	X		OR5H14	PLCD3
FOXN3	X		MIR101-1	TTLL9
FOXO1	X		CCNJL	LAMB2
FOXO3	X		LRRC39	THAP1
FOXO4	X		MIR95	MIR4645
FOXP3		X	KCNK2	APOA5
FPR1	X	X	KLB	ZC3H7B
FPR2		X	LIPI	PRSS38
FPR3		X	CYP2A6	TAS2R8
FRAT1	X		SNORD26	MIR6833
FRK	X	X	SDF2	GS1-124K5.4
FRMD4A		X	ANKRD33	TRAPPC3
FRMD8		X	MBD4	GUCY2C
FSCN1	X		TMEM133	SNORA40
FSHB	X		MAP1A	FAXDC2
FST	X		TNFRSF10D	PRLHR
FSTL3	X		SLC17A4	TMEM211
FTCD	X		SLC25A30	SPECC1L-ADORA2A
FTL	X		SNORD115-46	GAB4
FUCA1	X		PLCG1-AS1	OR8D1
FURIN	X		POTEB2	DMRTC2
FUS	X		MAP2K4	ZFY
FUT4	X		C22orf46	OCM
FUT8	X		TLL2	TSPYL5
FXN	X		MIR296	FAM27E3
FXYD1	X		OXCT2	PIGZ
FYB	X		RPL30	GPN2
FYN	X		MR1	TMTC1
FZD1	X		AHRR	HINT2
FZD2	X	X	MIR3661	TMSB15B
FZD3		X	SERPINB9	ARHGAP21
FZD4	X		RHNO1	CRYGC
FZD5	X		CXorf49B	ZNF596
FZD7	X		LINC01179	NEK8
G0S2	X		FAM98C	CCDC112
G3BP1	X		CYP4F30P	SEC14L3
G3BP2	X		DACH2	SULT1C2P1
G6PC	X		CRYM	FAM173A
G6PC2	X		DDRGK1	CXorf51A
G6PD	X		TET2	SPTLC2
GAA	X		LINC01299	RPH3AL
GAB2	X		KIRREL3	SLC35G1
GABARAPL1	X		OR1A1	NKX2-3
GABARAPL2	X		MIR3928	MSL2
GABBR1	X		MECOM	RSAD1
GABRA3	X		RND1	NTSR2
GAD1	X		NRG1	OTOA
GAD2	X		EPS8	GJD2
GADD45A	X		ZNF587	NOTUM
GADD45B	X		DCAF15	C5orf64
GADD45G	X		BTBD2	HAAO
GAL	X		PRRT4	DLEU7-AS1
GAL3ST1	X		GAP43	YBEY
GAL3ST4		X	C3orf38	CAPN12
GALC	X		MIR4430	CDH22
GALE	X		COL28A1	SLC14A1
GALK1	X		ASH2L	LINC01257
GALK2	X		PATL2	RNA5S4
GALM	X		ELK3	CSPG4
GALNT1	X		MAP2K2	GOLGA6C
GALNT3	X		PPEF1	ZNF395
GALR1		X	SPP2	SFXN3
GAMT	X		OR5AU1	EVC
GAPDH	X		MBD3L3	UGT1A5
GAPDHS	X		MIR4520-2	TMSB15A
GAPVD1	X		PPM1E	RFTN2
GART	X		THRAP3	C11orf96
GAS1	X		DPY19L3	HIPK1
GATA1	X		ZDHHC9	C9orf152
GATA3	X		OR5M3	LINC01082
GBE1	X		PTPA	APOB
GBF1	X		CCDC68	SLC26A4
GBP2	X		COL6A6	ZCCHC8
GBP4	X		RALYL	ATP2B2
GBP6	X		ZDHHC20	CEP164
GC	X		SATB2	EP400
GCA	X		RTN4R	LRFN1
GCDH	X		LINC00675	CXXC1P1
GCG	X		TMEM131	PCDHGB1
GCH1	X		STAT5B	COL24A1
GCK	X		TYROBP	LINC01435
GCKR	X		CHCHD5	HSD17B12
GCLC	X		RBM3	MLXIP
GCLM	X		JARID2	MCEMP1
GCNT1	X		CYP20A1	GRN
GCNT2	X		SHISA5	USF3
GDA	X		PUSL1	VWC2
GDE1	X		MEA1	MTMR12
GDNF	X		GPR146	ALMS1-IT1
GEM	X		ZNF862	MYO6
GEMIN4	X		PCDHA11	GRK3
GFI1	X	X	LRIG2	IFFO1
GFPT1	X		OTP	RASGEF1C
GFPT2	X		MARCKSL1	MARCH7
GFRA1	X		CCDC51	ADPGK
GGA2	X		PRRG4	RBM27
GGH	X		CLSTN1	BTLA
GGT5		X	SLC7A9	DOK6
GHITM	X		TTC32	FLJ36000
GHRL	X		MIR3689E	CCDC115
GINS1	X		ZMYM3	MIR5692C2
GINS2	X		ZIK1	SUN3
GINS3	X		WNK2	MYCNOS
GINS4	X		CFL1P1	GIMAP1-GIMAP5
GIPR		X	VANGL2	GTPBP4
GJA1	X		MIR374C	TMEM249
GJA5	X		NR2C1	HKR1
GJB3	X		HOXA-AS3	GALNTL6
GLA	X		PIFO	CEACAM5
GLCE	X		UBE2Q1-AS1	OTUD7B
GLDC	X		SGF29	MPST
GLI1	X		MFSD3	PCYT1B
GLIPR1	X		PLPPR1	MIR4308
GLIPR2	X		DSG2	FOXN1
GLMN	X		PFDN1	H1FOO
GLO1	X		EPB41L5	ZC3HAV1L
GLRX	X		WDR26	KRT78
GLRX2	X		MIR2467	MIR3922
GLRX5	X		HHAT	GTSF1L
GLS	X		MGST2	TRAPPC3L
GLS2	X		GGT6	RAB11B-AS1
GLUD1	X		OR2V2	MYOCD
GLUL	X		TMEM110	IL17REL
GM2A	X		KIR3DL3	ZBED9
GMCL1	X		BBOF1	YPEL4
GMFB	X		EXOC3L1	CRYL1
GMPPA	X		SH3PXD2A	RIT2
GMPPB	X		CTDSPL2	DUBR
GMPR	X		PITPNM1	ALDH5A1
GMPR2	X		SNORD54	SLC7A6OS
GMPS	X		CCDC84	COMMD3-BMI1
GNA14	X		FLRT1	TBC1D9
GNA15	X		CCDC85C	LINC01504
GNAI1	X		CRHBP	CRYZL1
GNAI2	X		APOL4	SNORD107
GNAO1	X		PADI2	HACE1
GNAS	X		LINC01387	UBD
GNB2	X		ONECUT3	UNC79
GNB4	X		MIR549A	MGC27382
GNE	X		SHROOM4	LEKR1
GNG11	X		SNORD94	ANGPTL8
GNG12	X		POTED	BRD8
GNG2	X		OR5A1	MIR488
GNG7		X	TCTEX1D4	ZER1
GNGT1	X		MIR3681	PGCP1
GNGT2	X		CYP4F3	RITA1
GNL3	X		XIRP2	KDELC1
GNLY		X	ZKSCAN4	SNORD115-13
GNMT	X		APOBEC3B-AS1	C12orf40
GNPAT	X		UGT2A2	SND1
GNPDA1	X		HIST1H2BF	ASAP1-IT2
GOLGA4	X		CLNK	LRRC23
GOSR2	X		CYP4Z2P	ACYP1
GOT1	X		ARHGEF18	S100A7
GOT2	X		CYP11B1	NXF3
GP1BA	X		MIR4480	BTBD10
GP2	X		MARVELD1	OR5B17
GP9	X		OR8S1	SNORA78
GPAM	X		GNPTAB	DLX2-AS1
GPC1	X		KRTAP20-3	AFF2
GPC3	X		ACTG1P17	MAK16
GPC4	X	X	KANK3	TEPP
GPD1	X		FAM53C	MAGEB5
GPD1L	X		GAS5-AS1	CHD5
GPD2	X		DEPDC1-AS1	BTN3A2
GPHN	X		ZMYM2	LINC01169
GPI	X		ZNF215	PRAMEF7
GPNMB	X		MIR28	DERL1
GPR1		X	ALG10	NCALD
GPR132	X		HDGFL1	CPSF4
GPR171		X	SNX1	CKLF
GPR18	X	X	NRF1	IMMP1L
GPR182	X		PSMC1	MIR8073
GPR183	X	X	KIAA1033	KRT84
GPR19	X	X	FAM132A	ATCAY
GPR25		X	KCTD17	MIR586
GPR3	X		MIR3129	OR52E4
GPR65	X	X	TSPAN11	MIR3667
GPR83	X		KRTAP13-2	ABO
GPR87	X		ITGA8	ADAM29
GPRC5B	X		CHRDL2	DUSP18
GPRC5C	X		MRGPRX3	OR5M11
GPX1	X		TSPY3	SFTPD
GPX2	X		SPATA31A3	DNAH10
GPX3	X		MIR302A	XRCC1
GPX4	X		SRP14-AS1	FAAP24
GPX7	X		MIR6859-2	ITGB2-AS1
GPX8	X		CADM4	NLRP2B
GRAP2		X	KRTAP1-1	ZFP69B
GRB2	X		RFFL	MIR6826
GRB7	X		PGBD2	LINC01596
GREB1	X		LINC00511	ADARB2-AS1
GREM1	X		SNORD63	ECHDC2
GRHPR	X		HOXB3	CLN3
GRID2	X		TMEM239	UTP23
GRINA	X		NPHS2	AGTPBP1
GRK5	X		OR5K3	PYGO1
GRM8	X		CMAS	KIAA0408
GRPEL1	X		GSTO2	ASAH1
GRWD1	X		LINC00426	FUBP1
GSG1	X		SH2D3A	CCDC71L
GSK3B	X		GVINP1	ATG2A
GSN	X		CCDC159	NRAS
GSPT1	X		MGC32805	DLGAP1-AS5
GSR	X		ACKR4	CHIA
GSS	X		TMEM41A	TNFSF12
GSTA3	X		ZNF497	ITPRIPL1
GSTK1	X		SULT1E1	LINC00671
GSTM1	X		DPYD-AS2	POLK
GSTM2	X		GAPLINC	TSSK1B
GSTM3	X		KIF16B	TTC7B
GSTM4	X		MIR6085	PALD1
GSTO1	X		KCND3-IT1	MIR4787
GSTT2	X		LINC00208	AMN
GSTZ1	X		IL17RC	MIR1295B
GTF2A2	X		C3P1	KRT36
GTF2B	X		LRAT	ZNF705G
GTF2F1	X		FAM84B	CAHM
GTF2H1	X		MIR412	ZSCAN2
GTF2H3	X		DNAAF3	POGZ
GTF2H5	X		NMNAT2	SLC34A2
GTF3C5	X		MIR525	GTF2H4
GUCY1A3	X		OR51Q1	HIST1H3J
GUCY1B3	X		KLHL28	MIR526A2
GUCY2D	X		ZNF528-AS1	RTBDN
GUK1	X		ASTE1	HIST1H2AK
GUSB	X		LINC01495	ZC3H12B
GUSBP11		X	CDK15	FBXO22
GYPA	X		SNORA50A	ARHGAP15
GYPB	X		RABGGTA	FGF19
GYPC	X		SERTAD2	ACTR8
GYPE	X	X	SHQ1	DNAH3
GYS1	X		CXorf40B	NWD1
GYS2	X		LINC00933	C4orf17
GZMA	X	X	DDX20	MDM4
GZMB	X	X	STK36	GLB1L
GZMH		X	CHID1	BTBD19
GZMK	X	X	MIR218-1	LINC00836
GZMM		X	CYP2U1	MIR4435-1
H1F0	X		NR2F1	ZNF786
H2AFJ	X		SSTR1	ADAM18
H2AFV	X		CCDC60	CHMP2B
H2AFX	X		MIR129-2	UMODL1
H2AFY2	X		THSD7A	C8orf76
H2AFZ	X		CASC17	CATSPER3
HACL1	X		TRIM9	CCDC169
HADH	X		SNORA70D	VSX1
HADHA	X		VTA1	UTP3
HADHB	X		KANSL3	TSPAN18
HAGH	X		MIR514A2	PGBD1
HAL		X	MTA2	POLR2J3
HAO1	X		RBBP8NL	HEXIM2
HAO2	X		RGMA	TBC1D8B
HAS1	X		ZNF14	TTC34
HAS2	X		LINC00488	C9orf78
HAX1	X		FBXW8	MIR3975
HBB	X		METAP1D	PROSER3
HBD	X		NUP214	PLSCR2
HBEGF	X		CLEC18A	UPK1A
HBQ1	X		BVES	FAM216A
HBZ	X		OR1J2	CNTN4
HCCS	X		SPATA6L	HS3ST3B1
HCK		X	SEC24C	SRRM1
HCLS1	X		SLC5A9	VGF
HDAC1	X		NEUROD6	KIR2DL3
HDAC11	X		LINC00106	SMAD1-AS2
HDAC2	X		LIX1L	PCDH17
HDAC3	X		ZHX2	ARMC9
HDAC5	X		RTFDC1	NPY
HDAC6	X		SCARA3	LINC00919
HDAC9	X		MIR515-2	PHYHIPL
HDC		X	PM20D1	FAM20B
HDDC2	X		SPDYE7P	RAB42
HDGF	X		SEMA4B	ABCG1
HDLBP	X		MIR548AK	GOLGA8O
HEBP1	X		SCYL3	MIR4774
HELLS	X		TMEM17	ROBO3
HERC6	X		C9orf116	MUC13
HERPUD1	X		MIR8084	LDLRAD4-AS1
HES1	X		MIR6854	CYP3A7
HES6	X		ARSD	BICDL2
HESX1		X	TSPAN19	MGAT4EP
HEXA	X		SPAG8	TBC1D3E
HEXIM1	X		TCFL5	PPIL2
HEY1	X		ZNF30	FAM86EP
HEY2	X		MIR4490	DHRSX
HEYL	X		SPINK5	ZNF610
HGF	X		MIR6507	SCGB2A1
HGFAC	X		CXXC5	GCHFR
HHEX	X	X	ADGRB3	CEP19
HIBCH	X		KLHL33	RNF125
HIC1		X	PIH1D1	ZNF646
HIF1A	X		HCG25	CTB-7E3.1
HINT1	X		PTDSS1	METTL15
HIPK2	X		JAZF1	TGIF2LX
HIRA	X		CCNB1IP1	GORASP1
HIST1H1C	X		BBS9	PINX1
HIST1H1T	X		UNCX	LINC01318
HIST1H2AE		X	HSPB7	MIR548P
HIST1H2BB	X		PDE9A	GNAT2
HIST1H2BG		X	SMARCE1	LGALS4
HIST1H2BK	X		CA11	MFSD13A
HIST1H4C	X		OPCML	DEF8
HIST3H2A	X		ENTPD3	MTA3
HK1	X		SYF2	FOXA3
HK2	X		POU4F3	HNRNPAB
HK3		X	SMIM10L2A	LINC00374
HKDC1	X		CECR6	RCC1L
HLA-A	X		LRRN2	ACKR3
HLA-B	X		SNORD18A	HCN4
HLA-C	X		SSC5D	MIR518D
HLA-DMA	X		AAK1	METTL11B
HLA-DMB	X		KRTAP10-10	PKN3
HLA-DOA	X		ADGRG4	LILRB1
HLA-DOB	X	X	GPR89A	STX16-NPEPL1
HLA-DQA1	X	X	LINC00396	ZNF513
HLA-DRA	X		PON2	SHISA9
HLA-E	X		RGR	NUTM2A
HLA-F	X		PEX5L	LYZ
HLA-G	X		CMIP	CCDC137
HMBS	X		NMT2	GABRB1
HMGA1	X		PWAR1	KRTAP5-AS1
HMGB2	X		KRTAP9-2	PLEKHA5
HMGB3	X		ATXN10	KIN
HMGCL	X		C11orf87	LINC01031
HMGCR	X		AP3M2	HIST1H4B
HMGCS1	X		LINC01304	OPRD1
HMGCS2	X		PRDM13	ITIH4-AS1
HMGN2	X		NUTM2G	MRPS18A
HMMR	X		LONRF3	RNVU1-15
HMOX1	X		LINC01019	ANAPC11
HMOX2	X		CSNK1A1L	FMO6P
HN1	X		CDV3	MIR520B
HNF1A	X		SLC35D2	FAM20A
HNF4A	X		YIF1B	HIST1H4J
HNMT		X	OR4C13	PLCXD2
HNRNPA1	X		CTDSP1	BBS10
HNRNPA2B1	X		GLIS1	SPRTN
HNRNPC	X		C11orf68	CLRN1-AS1
HNRNPD	X		ATL1	DBIL5P
HNRNPR	X		LINC00605	ZNF783
HNRNPU	X		DBH-AS1	SH3BP2
HOMER1	X		GRIA4	FAU
HOMER2	X		ADAMTS4	FAM99A
HOOK3	X		AMBP	MCF2
HOPX	X		LINC01618	SNX6
HOXA1		X	FRS3	GTF2F2
HOXB1	X		SSBP2	OR10H1
HOXB9	X		CCDC171	CEPT1
HOXC10	X		FANK1	ZNF282
HOXD11	X		PCTP	GPR1-AS
HPCAL4	X		C10orf53	ABCC6P2
HPGD	X		GPR139	PIK3C2A
HPGDS		X	PCDHGB4	COL4A6
HPN	X		TTYH2	PCBP1-AS1
HPRT1	X		GADL1	MIR1245A
HPSE		X	IRX5	RSPRY1
HR	X		SH2D1B	ANKS1B
HRAS	X		KIAA1328	MED27
HRC	X		SRP68	TDG
HRG	X		CFL2	COPS7A
HRH1	X	X	MIR323A	PCAT19
HS2ST1	X		F8A1	OR52E6
HS3ST1	X		GCM1	GP6
HS6ST2	X		MIR448	TMEM165
HSD11B1	X		RIPK4	RNA5S9
HSD11B2	X		PRR14L	PSMG4
HSD17B10	X		MRPS28	DPYSL5
HSD17B11	X		CD200R1L	TMEM141
HSD17B14	X		OR52N5	AGBL5-AS1
HSD17B2	X		CHRAC1	CCDC14
HSD17B4	X		WAPL	LINC00504
HSD17B6	X		FBXO42	PIWIL1
HSD17B7	X		COL4A3	GGTA1P
HSD3B1	X		PRIMA1	LZTS1
HSD3B7	X		RUNX1T1	TSPY26P
HSDL2	X		LINC01471	FUT5
HSP90AA1	X		CYP2C9	LCN15
HSP90AB1	X		MIR30D	LRRC73
HSPA13	X		TSACC	GOLPH3L
HSPA1A	X		COLEC12	PPP3CA
HSPA1L	X		BSCL2	HCAR3
HSPA2	X		LRRIQ4	SLC39A3
HSPA4	X		TMEM64	MSTN
HSPA4L	X		ZCCHC13	KIDINS220
HSPA5	X		TCTEX1D1	RAB8A
HSPA6		X	FZD10-AS1	CARHSP1
HSPA8	X		EFR3B	ZNF706
HSPA9	X		CCDC50	MIR208A
HSPB1	X		HIST2H2BE	MIR30C1
HSPB2	X		LINC01020	NKX1-1
HSPB8	X		ING4	SPG20-AS1
HSPD1	X		TRIM2	EYS
HSPE1	X		NFKBIL1	MIR3137
HSPH1	X		MIR7975	MRC1
HTATIP2	X		MRFAP1	RTL1
HTR1B	X		METTL1	TMCO4
HTR1D	X		EMC4	ZNF658
HTR2B		X	LINC00616	UBE2QL1
HTR5A	X		UBE2K	PPP1R32
HTR7	X		LINC00476	MIR4323
HTRA1	X		TRIM66	PPP2R5A
HTRA2	X		ZFHX2	DCLK3
HUS1	X		TCTN2	FBXO21
HUWE1	X		USP17L25	FAM53A
HYAL2	X		HIST1H2AL	CCNB3
HYOU1	X		TRIM3	SYCP2
IAPP	X		LINC00582	SLC35E4
IARS	X		TNFRSF6B	C11orf74
ICA1	X	X	METTL17	TAC4
ICAM1	X		MDC1-AS1	MIR892C
ICAM2	X		KRT19P2	PRSS1
ICAM4	X		TMEM89	CCSER2
ICAM5	X		FRZB	VGLL3
ICOS	X	X	TGFB2-OT1	EGFLAM
ID1	X		PRRX2	KLHL42
ID2	X		NIPSNAP3A	TOR1AIP1
ID3	X		ST7-AS1	COQ2
IDE	X		ADGRG3	SEMA3B-AS1
IDH1	X		AQP4	CCNI
IDH2	X		TUBA1B	RARA-AS1
IDH3A	X		COPS9	SNURF
IDH3B	X		MIDN	ZMYM4
IDH3G	X		MIER2	LINC01569
IDI1	X		C8orf88	DPP6
IDO1	X	X	MOXD1	SLC16A1-AS1
IDS	X		FBXO33	PANK1
IDUA	X		PQBP1	NOB1
IER2	X		TAS2R1	OLFML1
IER3	X		MIR4678	MIR5683
IER5	X		OTX2-AS1	KRT86
IFI27	X		ZNF37A	BLOC1S5-TXNDC5
IFI30	X		GPR26	METTL8
IFI35	X		MIR8056	ADAT2
IFI44	X		NT5C3B	MIR4274
IFI44L	X	X	EGFL6	ENDOU
IFIH1	X		SLC43A3	GSKIP
IFIT1	X		MVB12B	C17orf64
IFIT2	X		MRM2	NDUFAF2
IFIT3	X		OR52R1	C6orf47
IFITM1	X		PPM1J	FLJ16779
IFITM2	X		LINC00583	KRTAP4-2
IFITM3	X		GMIP	PEPD
IFNA10		X	ZFYVE1	FLJ33360
IFNAR1	X		DDHD1	CALML3
IFNAR2	X		CDK10	APOC4
IFNB1	X		NUS1	MIR4729
IFNG	X	X	TGIF2-C20orf24	FCMR
IFNGR1	X		ZNF599	LINC01611
IFNGR2	X		CXorf66	RGS2
IFRD1	X		SERPINE3	PLPPR3
IFT88	X		LGR4	EFCAB3
IGF1	X		CRAT40	RWDD1
IGF1R	X		CELF5	MIR6796
IGF2	X		LCE1C	SDR42E1
IGF2R	X		PRELID2	MIR320B1
IGFBP1	X		MORC2	RAB4B
IGFBP2	X		PRICKLE2-AS3	SLC24A5
IGFBP3	X		MIRLET7I	MMP24
IGFBP4	X		CAMTA1	NSA2
IGFBP5	X		RBPMS2	MRPL10
IGFBP6	X		AZI2	HCG22
IGFBP7	X		MAFK	BMP8B
IGSF1	X		CELA3B	CT47A5
IGSF3	X		LY6G5B	CNIH3
IGSF6	X	X	DEFB135	VENTX
IKBKAP	X		MIR885	INPP5B
[truncated: 2,500 more rows]

## Sheet: Supp Table 3
Study Abbreviation (TCGA)	Full Study Name	Median OS	95%CI OS
ACC	Adrenocortical carcinoma	79.2	[52.8;inf]
BLCA	Bladder Urothelial Carcinoma	24.0	[19.2;31.2]
BRCA	Breast invasive carcinoma	112.8	[103.2;115.2]
CESC	Cervical squamous cell carcinoma and endocervical adenocarcinoma	69.6	[45.6;100.8]
CHOL	Cholangiocarcinoma	24.0	[14.4;64.8]
COAD	Colon adenocarcinoma	67.2	[55.2;93.6]
DLBC	Lymphoid Neoplasm Diffuse Large B-cell Lymphoma	120.0	[120.0;120.0]
ESCA	Esophageal carcinoma	16.8	[12.0;21.6]
GBM	Glioblastoma multiforme	12.0	[12.0;14.4]
HNSC	Head and Neck squamous cell carcinoma	36.0	[26.4;50.4]
KICH	Kidney Chromophobe	inf	[inf;inf]
KIRC	Kidney renal clear cell carcinoma	81.6	[72.0;120.]
KIRP	Kidney renal papillary cell carcinoma	inf	[86.4;inf]
LAML	Acute Myeloid Leukemia	21.6	[12.0;48.]
LGG	Brain Lower Grade Glioma	64.8	[52.8;81.6]
LIHC	Liver hepatocellular carcinoma	45.6	[28.8;57.6]
LUAD	Lung adenocarcinoma	40.8	[36.0;50.4]
LUSC	Lung squamous cell carcinoma	38.4	[33.6;50.4]
MESO	Mesothelioma	16.8	[14.4;24.]
OV	Ovarian serous cystadenocarcinoma	43.2	[38.4;45.6]
PAAD	Pancreatic adenocarcinoma	16.8	[12.0;19.2]
PCPG	Pheochromocytoma and Paraganglioma	inf	[inf;inf]
PRAD	Prostate adenocarcinoma	117.6	[115.2;117.6]
READ	Rectum adenocarcinoma	52.8	[48.0;inf]
SARC	Sarcoma	60.0	[48.0;76.8]
SKCM	Skin Cutaneous Melanoma	50.4	[48.0;62.4]
STAD	Stomach adenocarcinoma	19.2	[16.8;24.0]
TGCT	Testicular Germ Cell Tumors	inf	[inf;inf]
THCA	Thyroid carcinoma	inf	[inf;inf]
THYM	Thymoma	115.2	[96.0;115.2]
UCEC	Uterine Corpus Endometrial Carcinoma	112.8	[103.2;115.2]
UCS	Uterine Carcinosarcoma	24.0	[16.8;50.4]
UVM	Uveal Melanoma	45.6	[43.2;inf]

## Sheet: Supp Table 4
	Number of patients	Proportion of censored patients	Median OS in months (using KM estimator)	95%CI
Training set	5529	0.540	67.2	[64.8; 72.0]
Validation set	500	0.536	72.0	[64.8; 88.8]
Test set	500	0.546	62.4	[55.2; 76.8]

## Sheet: Supp Table 5
Tumor type	C-index_no_pretrain	C-index_deepOS	Difference	nb_patients
ACC	1.0	1.0	0.000000	5
BLCA	0.399351	0.49026	0.090909	22
BRCA	0.448164	0.565875	0.117711	48
CESC	0.58	0.68	0.100000	9
COAD	0.478102	0.452555	-0.025547	23
DLBC	0.666667	0.666667	0.000000	4
ESCA	0.615385	0.576923	-0.038462	7
GBM	0.714286	0.517857	-0.196429	8
HNSC	0.4801	0.49005	0.009950	24
KICH	1.0	0.5	-0.500000	3
KIRC	0.685083	0.697514	0.012431	35
KIRP	0.578125	0.65625	0.078125	12
LAML	0.678571	0.892857	0.214286	7
LGG	0.683007	0.735294	0.052288	22
LIHC	0.785124	0.801653	0.016529	18
LUAD	0.573171	0.597561	0.024390	20
LUSC	0.648402	0.582192	-0.066210	26
MESO	0.47619	0.547619	0.071429	7
OV	0.391026	0.469551	0.078526	27
PAAD	0.628205	0.576923	-0.051282	14
READ	0.227273	0.045455	-0.181818	7
SARC	0.772727	0.693182	-0.079545	12
SKCM	0.632075	0.518868	-0.113208	18
STAD	0.497312	0.569892	0.072581	21
TGCT	0.9	1.0	0.100000	6
THCA	0.642857	0.928571	0.285714	21
UCEC	0.693833	0.773128	0.079295	31
UCS	0.666667	0.666667	0.000000	4
UVM	1.0	1.0	0.000000	4

## Sheet: Supp Table 6
Patient	Censored	Ground truth	Prediction	MSE
1	No			0.06
2	Yes			0.0125
2	Yes			0.0125
