# Supplementary material for: DeepOS: pan-cancer prognosis estimation from RNA-sequencing data
Source: Research Square preprint supplement (doi:10.21203/rs.3.rs-7556679/v1), 2025-11-03
Supplement: Supplementary file 3 [file da0b10fd44036d3847c26a33.docx]

**Supplementary legends for:**

**DeepOS: pan-cancer prognosis estimation from RNA-sequencing data**

# **Authors**

M. Pavageau1,2,3+, L. Rebaud1+, C. Tanguy1, D. Morel1,3, E. Deutsch1,3, C. Massard1,3, H. Vanacker1,5, L. Verlingue1,3,4,6*

1. Drug Development Department (DITEP), Gustave Roussy - Cancer Campus, Villejuif, France
2. CentraleSupelec, Gif sur Yvette, Paris Saclay, France
3. INSERM UMR1030, Molecular Radiotherapy and Therapeutic Innovations, Gustave Roussy - Cancer Campus, Villejuif, France
4. UPS, University Paris Saclay
5. Centre Léon Bérard, Lyon, France

+MP and LR have contributed equally to the study

***Corresponding author:** [loic.verlingue@gustaveroussy.fr](mailto:loic.verlingue@gustaveroussy.fr) – tel. +33142113258 – 114 rue Edouard Vaillant, 94800 Villejuif, France

**Supplementary Figures legends**

**Supplementary Figure 1: cancer type repartition in the split datasets – a)** cancer type repartition in the train (a) and validation (b) datasets are similar. See supplementary table 3 for translation between TCGA nomenclature and histological types.

**Supplementary Figure 2: DeepOS model architecture** – DeepOS is multilayer perceptron (MLP) composed of two sub-models. The first, called “Low abstraction MLP”, is specifically trained on the organ data, whereas the second, “High abstraction MLP”, is more cancer survival specific. To each layer, a ReLU function is applied, and regularization is performed (by batch normalization, dropout and L1N and L2N). DeepOS pipeline can be broken down into three sub-steps : first, the organ specific layer is generated and trained on organ data with a softmax output, then this layer is frozen and the survival specific sub-model is generated and trained on survival data, and finally, both model are unfrozen and the entire DeepOS model is trained on survival data. Survival data is transformed into time interval probabilities to be used in a mean squared error loss function to train the neural network.

**Supplementary Figure 3:** Results of the organ of origin prediction task: **a**, accuracy on the validation set for all the trials run during the hyper-parameter search procedure showing a high performance of the models overall (mean hyper-parameter search accuracy = 0.849 and standard deviation = 0.292) and **b**, confusion matrix of the best validation model predictions per organ of origin (accuracy of 0.9835, precision of 0.9842, recall of 0.9835 and F1-score of 0.9836).

**Supplementary Figure 4: a-d**, Kaplan-Meier survival curves predicted by DeepOS with and without pre-training and with pretrained hyper-parameters (and new training on survival), compared to the observed curve of OS among patients in the test cohort (**b**), the training cohort (**c**) and the validation cohort (**d**).

**Supplementary Figure 5: a**, Line chart of the C-indexes computed according to the mean OS of 10 subgroups of 50 patients derived from the test cohort and predicted using DeepOS with (blue, left) and without (green, right) pre-training on organ prediction. **b**, Bar charts representing the distributions of the percentage of patients experiencing the survival event per time interval/bin, including censored events (top chart) or not (bottom chart). One time interval accounts for 72 days. OS: overall survival.

**Supplementary Figure 6**: **a**, Bar chart of the C-indexes of DeepOS without pre-training according to the tumor type (compared to Figure 6a corresponding to fine-tuned DeepOS results). We considered only tumor types represented within the test cohort by at least three samples associated with uncensored survival outcome. The red dotted line indicates a C-index of 0.50 (random prediction). The black line indicates a C-index of 0.715, which refers to the median C-index of DeepOS pan-cancer predictions. Patient numbers are represented above the bars. **b**, Concordance indexes after few shot learning on BRCA, LUAD and LUSC from DeepOS with overall C-index of 0.67 **c**, Kaplan-Meier survival curves comparing DeepOS predictions after few shot learning on BRCA, LUAD and LUSC and the observed survival with log-rank p-value=0.61.

**Supplementary Figure 7:** Kaplan-Meier survival curves predicted by a model trained with the full set of gene expression compared to the observed curve of OS among patients in the training (**a**), the validation (**b**) and the test cohort (**c**) demonstrating important overfitting more easily identified visually that computationally, supporting the importance of survival curve analysis.

**Supplementary Figure 8:** **a**, Gaussian distribution of the mean SHAP values. We have further presented the genes with abslute mean SHAP values >0.002, **b**, Heatmap of the mean SHAP values of the 10 genes (with absolute mean SHAP value > 0.002), according to the tumor type. Blue and red respectively indicate a positive and a negative correlation between high gene expression and poor prognosis estimation.

**Supplementary Figure 9:** SAVAE-Cox model (Self Attention Variational Auto Encoder - Cox). **a.** A pre-training step used an auto-encoder with self-attention. The auto-encoder architecture has a bottleneck shape for latent space representation with an encoder part that reduces dimension and a decoder part. The training consisted in outputting the input RNA-seq using a discriminator model, for 300 epochs on the train set. **b.** We fine-tuned the pre-trained encoder part with the Cox-loss on the survival data for 30 epochs.

**Supplementary Tables Legends**

**Supplementary Table 1:** Summary of the performances of previously published Deep Learning models that used pan-cancer RNA-seq expression data from the TCGA project to predict overall survival of patients affected with cancer. NA: not available; "=" was used when the exact number was specified or could be calculated, whereas "~" was used when the exact number was not specified and was extrapolated from a figure

**Supplementary Table 2**: Full list of the 4,499 genes related to cancer and selected to reduce dimensions in DeepOS. The indication of whether each gene was found in the MSigDB or/and LM22 database is specified by “X”. Random selections #1 and #2 depict the full gene lists that we used to study the added value of our primary gene selection.

**Supplementary Table 3**: Study abbreviation meanings of the different TCGA cohorts that were used, with related median OS (in months) and 95% confidence intervals.

**Supplementary Table 4:** Description of the training, validation and test datasets obtained from the 80%/10%/10% random splitting on selected pan-cancer RNA-seq samples from the TCGA.

**Supplementary Table 5:** Performances (C-indexes) of DeepOS computed per tumor type on the test set, with and without pre-training.

**Supplementary Table 6**: Examples of calculation of the loss with mean squared error (MSE) for survival data. Censored values were ignored in the computation of MSE and doing so, the model was trained only on the observed follow up.
